# Supplementary material for: Group-10 π-hole⋯dz2[MII] interactions: a theoretical study of model systems inspired by CSD structures
Source: Royal Society of Chemistry journal article supplement (doi:10.1039/d3dt00698k), 2023-01-01
Supplement: d3dt00698k1.pdf [file d3dt00698k1.pdf]

Supplementary Material for manuscript:

## **Group-10 $\pi$ -hole $\cdots$ d<sub>z<sup>2</sup></sub> [M<sup>II</sup>] interactions: a theoretical study of model systems inspired by CSD structures.**

**Miriam Calabrese<sup>a</sup>, Sergi Burguera<sup>b</sup>, Giuseppe Resnati<sup>a,\*</sup> and Antonio Frontera<sup>b,\*</sup>**

<sup>a</sup>*NFMLab, Department of Chemistry, Materials, and Chemical Engineering "Giulio Natta", Politecnico di Milano, via L. Mancinelli 7, I-20131 Milano, Italy,  
E-mail: giuseppe.resnati@polimi.it.*

<sup>b</sup>*Departament de Química, Universitat de les Illes Balears, Crta de Valldemossa Km, 7.5, 07122 Palma de mallorca (Balears), SPAIN.  
E-mail: [toni.frontera@uib.es](mailto:toni.frontera@uib.es)*

### **Table of contents:**

|                                                                     |                   |
|---------------------------------------------------------------------|-------------------|
| <b>Cartesian coordinates of complexes 11-34</b>                     | <b>Pages 2-56</b> |
| <b>Figure S1 (QTAIM and NCiplot for nickel complexes 11-14)</b>     | <b>Page 57</b>    |
| <b>Figure S2 (QTAIM and NCiplot for palladium complexes 15-18)</b>  | <b>Page 58</b>    |
| <b>Figure S3 (QTAIM and NCiplot for nickel complexes 23-26)</b>     | <b>Page 59</b>    |
| <b>Figure S4 (QTAIM and NCiplot for palladium complexes 27-30)</b>  | <b>Page 60</b>    |
| <b>Figure S5 (QTAIM and NCiplot for platinum complexes 31b-34b)</b> | <b>Page 61</b>    |

### Cartesian coordinates of complexes 11-34

#### 11a.

|    |            |            |            |
|----|------------|------------|------------|
| C  | -2.5060253 | 1.2081836  | -1.3833788 |
| H  | -3.0921896 | 2.1349602  | -1.3780993 |
| C  | -3.1918590 | -0.0000925 | -1.3504988 |
| H  | -4.2722430 | -0.0001648 | -1.3221749 |
| C  | -2.5059769 | -1.2083352 | -1.3832349 |
| H  | -3.0920541 | -2.1351695 | -1.3777997 |
| O  | -1.2591033 | 1.3695477  | -1.4224110 |
| O  | -1.2590568 | -1.3695799 | -1.4222983 |
| C  | 2.5060253  | -1.2081836 | -1.3833788 |
| H  | 3.0921896  | -2.1349602 | -1.3780993 |
| C  | 3.1918590  | 0.0000925  | -1.3504988 |
| H  | 4.2722430  | 0.0001648  | -1.3221749 |
| C  | 2.5059769  | 1.2083352  | -1.3832349 |
| H  | 3.0920541  | 2.1351695  | -1.3777997 |
| O  | 1.2591033  | -1.3695477 | -1.4224110 |
| O  | 1.2590568  | 1.3695799  | -1.4222983 |
| Ni | 0.0000000  | 0.0000000  | -1.4122402 |
| C  | -1.3875158 | 0.0000985  | 1.9677005  |
| C  | -0.6937867 | -1.2016959 | 1.9638360  |
| C  | 0.6936265  | -1.2017846 | 1.9638373  |
| C  | 1.3875158  | -0.0000985 | 1.9677005  |
| C  | 0.6937867  | 1.2016959  | 1.9638360  |
| C  | -0.6936265 | 1.2017846  | 1.9638373  |
| H  | -1.2346741 | -2.1407982 | 1.9471541  |
| H  | 1.2343838  | -2.1409731 | 1.9471678  |
| H  | 1.2346741  | 2.1407982  | 1.9471541  |
| H  | -1.2343838 | 2.1409731  | 1.9471678  |
| H  | -2.4713514 | 0.0001625  | 1.9563200  |
| H  | 2.4713514  | -0.0001625 | 1.9563200  |

#### 11b.

|    |            |            |            |
|----|------------|------------|------------|
| C  | 2.5054179  | -1.2083680 | 1.3716794  |
| H  | 3.0914903  | -2.1351480 | 1.3632979  |
| C  | 3.1909741  | -0.0000779 | 1.3329421  |
| H  | 4.2710618  | -0.0001852 | 1.2963364  |
| C  | 2.5055125  | 1.2082200  | 1.3716146  |
| H  | 3.0916391  | 2.1349813  | 1.3630665  |
| O  | 1.2588918  | -1.3698110 | 1.4199204  |
| O  | 1.2589721  | 1.3697673  | 1.4199224  |
| C  | -2.5054179 | 1.2083680  | 1.3716794  |
| H  | -3.0914903 | 2.1351480  | 1.3632979  |
| C  | -3.1909741 | 0.0000779  | 1.3329421  |
| H  | -4.2710618 | 0.0001852  | 1.2963364  |
| C  | -2.5055125 | -1.2082200 | 1.3716146  |
| H  | -3.0916391 | -2.1349813 | 1.3630665  |
| O  | -1.2588918 | 1.3698110  | 1.4199204  |
| O  | -1.2589721 | -1.3697673 | 1.4199224  |
| C  | 0.0000835  | -1.3882621 | -1.9468468 |
| C  | 1.2011189  | -0.6936947 | -1.9503497 |
| C  | 1.2010844  | 0.6937966  | -1.9503496 |
| C  | -0.0000835 | 1.3882621  | -1.9468468 |
| C  | -1.2011189 | 0.6936947  | -1.9503497 |
| C  | -1.2010844 | -0.6937966 | -1.9503496 |
| Ni | 0.0000000  | 0.0000000  | 1.4111627  |
| H  | -2.1403496 | -1.2348664 | -1.9362739 |
| H  | -2.1404564 | 1.2347090  | -1.9362749 |
| H  | 2.1403496  | 1.2348664  | -1.9362739 |
| H  | 2.1404564  | -1.2347090 | -1.9362749 |
| H  | 0.0000855  | -2.4715681 | -1.9242661 |
| H  | -0.0000855 | 2.4715681  | -1.9242661 |

**12a.**

|   |            |           |            |
|---|------------|-----------|------------|
| C | -2.5067862 | 1.2074402 | -1.4214518 |
| H | -3.0920996 | 2.1343124 | -1.4262992 |
| C | -3.1921862 | 0.0000000 | -1.4430099 |
| H | -4.2724880 | 0.0000000 | -1.4582926 |

|    |            |            |            |
|----|------------|------------|------------|
| C  | -2.5067862 | -1.2074402 | -1.4214518 |
| H  | -3.0920996 | -2.1343124 | -1.4262992 |
| O  | -1.2580506 | 1.3692861  | -1.3932533 |
| O  | -1.2580506 | -1.3692861 | -1.3932533 |
| C  | 2.5067862  | -1.2074402 | -1.4214518 |
| H  | 3.0920996  | -2.1343124 | -1.4262992 |
| C  | 3.1921862  | 0.0000000  | -1.4430099 |
| H  | 4.2724880  | 0.0000000  | -1.4582926 |
| C  | 2.5067862  | 1.2074402  | -1.4214518 |
| H  | 3.0920996  | 2.1343124  | -1.4262992 |
| O  | 1.2580506  | -1.3692861 | -1.3932533 |
| O  | 1.2580506  | 1.3692861  | -1.3932533 |
| Ni | 0.0000000  | 0.0000000  | -1.3856312 |
| C  | -1.3615429 | 0.0000000  | 2.0239232  |
| C  | -0.6930909 | -1.2084438 | 2.0169615  |
| C  | 0.6930909  | -1.2084438 | 2.0169615  |
| C  | 1.3615429  | -0.0000000 | 2.0239232  |
| C  | 0.6930909  | 1.2084438  | 2.0169615  |
| C  | -0.6930909 | 1.2084438  | 2.0169615  |
| H  | -1.2547224 | -2.1332913 | 1.9972335  |
| H  | 1.2547224  | -2.1332913 | 1.9972335  |
| H  | 1.2547224  | 2.1332913  | 1.9972335  |
| H  | -1.2547224 | 2.1332913  | 1.9972335  |
| F  | -2.7024881 | 0.0000000  | 2.0238133  |
| F  | 2.7024881  | 0.0000000  | 2.0238133  |

**12b.**

|   |           |            |           |
|---|-----------|------------|-----------|
| C | 2.5053266 | -1.2084848 | 1.3700506 |
| H | 3.0897284 | -2.1360673 | 1.3611139 |
| C | 3.1910485 | 0.0000000  | 1.3326747 |
| H | 4.2712349 | 0.0000000  | 1.2997240 |
| C | 2.5053266 | 1.2084848  | 1.3700506 |
| H | 3.0897284 | 2.1360673  | 1.3611139 |
| O | 1.2581685 | -1.3686434 | 1.4159067 |
| O | 1.2581685 | 1.3686434  | 1.4159067 |

|    |            |            |            |
|----|------------|------------|------------|
| C  | -2.5053266 | 1.2084848  | 1.3700506  |
| H  | -3.0897284 | 2.1360673  | 1.3611139  |
| C  | -3.1910485 | 0.0000000  | 1.3326747  |
| H  | -4.2712349 | 0.0000000  | 1.2997240  |
| C  | -2.5053266 | -1.2084848 | 1.3700506  |
| H  | -3.0897284 | -2.1360673 | 1.3611139  |
| O  | -1.2581685 | 1.3686434  | 1.4159067  |
| O  | -1.2581685 | -1.3686434 | 1.4159067  |
| C  | 0.0000000  | -1.3637443 | -1.9438453 |
| C  | 1.2076308  | -0.6931899 | -1.9444101 |
| C  | 1.2076308  | 0.6931899  | -1.9444101 |
| C  | 0.0000000  | 1.3637443  | -1.9438453 |
| C  | -1.2076308 | 0.6931899  | -1.9444101 |
| C  | -1.2076308 | -0.6931899 | -1.9444101 |
| Ni | 0.0000000  | 0.0000000  | 1.4139006  |
| F  | 0.0000000  | 2.7018203  | -1.9372323 |
| F  | 0.0000000  | -2.7018203 | -1.9372323 |
| H  | -2.1327137 | -1.2549489 | -1.9317968 |
| H  | -2.1327137 | 1.2549489  | -1.9317968 |
| H  | 2.1327137  | 1.2549489  | -1.9317968 |
| H  | 2.1327137  | -1.2549489 | -1.9317968 |

**13a.**

|   |            |            |            |
|---|------------|------------|------------|
| C | -2.5053037 | 1.2087673  | -1.3309332 |
| H | -3.0881660 | 2.1365838  | -1.3108839 |
| C | -3.1896623 | -0.0003748 | -1.2829058 |
| H | -4.2691919 | -0.0005344 | -1.2323193 |
| C | -2.5050339 | -1.2093398 | -1.3309674 |
| H | -3.0877529 | -2.1372437 | -1.3109163 |
| O | -1.2582664 | 1.3678770  | -1.3955869 |
| O | -1.2579440 | -1.3682139 | -1.3956230 |
| C | 2.5053037  | -1.2087673 | -1.3309332 |
| H | 3.0881660  | -2.1365838 | -1.3108839 |
| C | 3.1896623  | 0.0003748  | -1.2829058 |
| H | 4.2691919  | 0.0005344  | -1.2323193 |

|    |            |            |            |
|----|------------|------------|------------|
| C  | 2.5050339  | 1.2093398  | -1.3309674 |
| H  | 3.0877529  | 2.1372437  | -1.3109163 |
| O  | 1.2582664  | -1.3678770 | -1.3955869 |
| O  | 1.2579440  | 1.3682139  | -1.3956230 |
| Ni | 0.0000000  | 0.0000000  | -1.4050789 |
| C  | -1.3904641 | 0.0004233  | 1.8915005  |
| C  | -0.6930857 | -1.1911799 | 1.8874105  |
| C  | 0.6923861  | -1.1916160 | 1.8874406  |
| C  | 1.3904641  | -0.0004233 | 1.8915005  |
| C  | 0.6930857  | 1.1911799  | 1.8874105  |
| C  | -0.6923861 | 1.1916160  | 1.8874406  |
| F  | -1.3539690 | -2.3448298 | 1.8757951  |
| F  | 1.3525470  | -2.3456764 | 1.8759087  |
| F  | 1.3539690  | 2.3448298  | 1.8757951  |
| F  | -1.3525470 | 2.3456764  | 1.8759087  |
| H  | -2.4719333 | 0.0007157  | 1.8746198  |
| H  | 2.4719333  | -0.0007157 | 1.8746198  |

**13b.**

|   |            |            |           |
|---|------------|------------|-----------|
| C | 2.5073606  | -1.2080515 | 1.3562691 |
| H | 3.0915551  | -2.1348899 | 1.3397069 |
| C | 3.1921608  | -0.0001046 | 1.3441763 |
| H | 4.2721029  | -0.0001290 | 1.3142173 |
| C | 2.5074245  | 1.2078552  | 1.3562178 |
| H | 3.0916742  | 2.1346626  | 1.3397231 |
| O | 1.2578269  | -1.3694221 | 1.3803399 |
| O | 1.2578942  | 1.3693261  | 1.3801734 |
| C | -2.5073606 | 1.2080515  | 1.3562691 |
| H | -3.0915551 | 2.1348899  | 1.3397069 |
| C | -3.1921608 | 0.0001046  | 1.3441763 |
| H | -4.2721029 | 0.0001290  | 1.3142173 |
| C | -2.5074245 | -1.2078552 | 1.3562178 |
| H | -3.0916742 | -2.1346626 | 1.3397231 |
| O | -1.2578269 | 1.3694221  | 1.3803399 |
| O | -1.2578942 | -1.3693261 | 1.3801734 |

|    |            |            |            |
|----|------------|------------|------------|
| C  | 0.0001778  | -1.3920189 | -1.9220074 |
| C  | 1.1900044  | -0.6926237 | -1.9267894 |
| C  | 1.1898242  | 0.6929184  | -1.9267748 |
| C  | -0.0001778 | 1.3920189  | -1.9220074 |
| C  | -1.1900044 | 0.6926237  | -1.9267894 |
| C  | -1.1898242 | -0.6929184 | -1.9267748 |
| Ni | 0.0000000  | 0.0000000  | 1.3895936  |
| H  | -0.0003082 | 2.4731971  | -1.8952086 |
| H  | 0.0003082  | -2.4731971 | -1.8952086 |
| F  | -2.3465372 | 1.3509742  | -1.9174307 |
| F  | -2.3462010 | -1.3515239 | -1.9174097 |
| F  | 2.3462010  | 1.3515239  | -1.9174097 |
| F  | 2.3465372  | -1.3509742 | -1.9174307 |

**14a.**

|    |            |            |            |
|----|------------|------------|------------|
| C  | -2.5073950 | 1.2077864  | -1.3858069 |
| H  | -3.0904585 | 2.1354178  | -1.3862820 |
| C  | -3.1918683 | -0.0000942 | -1.4195386 |
| H  | -4.2718947 | -0.0001957 | -1.4467755 |
| C  | -2.5072378 | -1.2078638 | -1.3858177 |
| H  | -3.0901297 | -2.1355905 | -1.3863226 |
| O  | -1.2576997 | 1.3676539  | -1.3453627 |
| O  | -1.2575277 | -1.3676513 | -1.3453098 |
| C  | 2.5073950  | -1.2077864 | -1.3858069 |
| H  | 3.0904585  | -2.1354178 | -1.3862820 |
| C  | 3.1918683  | 0.0000942  | -1.4195386 |
| H  | 4.2718947  | 0.0001957  | -1.4467755 |
| C  | 2.5072378  | 1.2078638  | -1.3858177 |
| H  | 3.0901297  | 2.1355905  | -1.3863226 |
| O  | 1.2576997  | -1.3676539 | -1.3453627 |
| O  | 1.2575277  | 1.3676513  | -1.3453098 |
| Ni | 0.0000000  | 0.0000000  | -1.3514030 |
| C  | -1.3833646 | 0.0000922  | 1.9707690  |
| C  | -0.6928289 | -1.2011661 | 1.9629083  |
| C  | 0.6926560  | -1.2012534 | 1.9628910  |

|   |            |            |           |
|---|------------|------------|-----------|
| C | 1.3833646  | -0.0000922 | 1.9707690 |
| C | 0.6928289  | 1.2011661  | 1.9629083 |
| C | -0.6926560 | 1.2012534  | 1.9628910 |
| F | -2.7069184 | 0.0001955  | 1.9755736 |
| F | 2.7069184  | -0.0001955 | 1.9755736 |
| F | -1.3585195 | -2.3431893 | 1.9524224 |
| F | -1.3582041 | 2.3433683  | 1.9523529 |
| F | 1.3585195  | 2.3431893  | 1.9524224 |
| F | 1.3582041  | -2.3433683 | 1.9523529 |

**14b.**

|    |            |            |            |
|----|------------|------------|------------|
| C  | 2.5075443  | -1.2080992 | 1.3495659  |
| H  | 3.0902201  | -2.1357523 | 1.3345217  |
| C  | 3.1926938  | -0.0001497 | 1.3426676  |
| H  | 4.2728965  | -0.0001411 | 1.3218594  |
| C  | 2.5075868  | 1.2080391  | 1.3495478  |
| H  | 3.0903350  | 2.1355854  | 1.3345046  |
| O  | 1.2573303  | -1.3683027 | 1.3654043  |
| O  | 1.2574579  | 1.3681869  | 1.3652820  |
| C  | -2.5075443 | 1.2080992  | 1.3495659  |
| H  | -3.0902201 | 2.1357523  | 1.3345217  |
| C  | -3.1926938 | 0.0001497  | 1.3426676  |
| H  | -4.2728965 | 0.0001411  | 1.3218594  |
| C  | -2.5075868 | -1.2080391 | 1.3495478  |
| H  | -3.0903350 | -2.1355854 | 1.3345046  |
| O  | -1.2573303 | 1.3683027  | 1.3654043  |
| O  | -1.2574579 | -1.3681869 | 1.3652820  |
| C  | 0.0001473  | -1.3868377 | -1.9106153 |
| C  | 1.1992808  | -0.6927695 | -1.9146908 |
| C  | 1.1991350  | 0.6929608  | -1.9146472 |
| C  | -0.0001473 | 1.3868377  | -1.9106153 |
| C  | -1.1992808 | 0.6927695  | -1.9146908 |
| C  | -1.1991350 | -0.6929608 | -1.9146472 |
| Ni | 0.0000000  | 0.0000000  | 1.3789013  |
| F  | -0.0002687 | 2.7074680  | -1.8984688 |



|   |            |            |            |
|---|------------|------------|------------|
| F | 0.0002687  | -2.7074680 | -1.8984688 |
| F | -2.3444123 | 1.3561149  | -1.9072208 |
| F | -2.3441682 | -1.3564832 | -1.9071611 |
| F | 2.3444123  | -1.3561149 | -1.9072208 |
| F | 2.3441682  | 1.3564832  | -1.9071611 |

**15a.**

|    |            |            |            |
|----|------------|------------|------------|
| C  | -2.5833075 | 1.2299523  | -1.4033939 |
| H  | -3.2126164 | 2.1280101  | -1.3968816 |
| C  | -3.2350264 | 0.0000000  | -1.3842276 |
| H  | -4.3164189 | 0.0000000  | -1.3672135 |
| C  | -2.5833075 | -1.2299523 | -1.4033939 |
| H  | -3.2126164 | -2.1280101 | -1.3968816 |
| O  | -1.3477755 | 1.4608763  | -1.4291782 |
| O  | -1.3477755 | -1.4608763 | -1.4291782 |
| C  | 2.5833075  | -1.2299523 | -1.4033939 |
| H  | 3.2126164  | -2.1280101 | -1.3968816 |
| C  | 3.2350264  | -0.0000000 | -1.3842276 |
| H  | 4.3164189  | 0.0000000  | -1.3672135 |
| C  | 2.5833075  | 1.2299523  | -1.4033939 |
| H  | 3.2126164  | 2.1280101  | -1.3968816 |
| O  | 1.3477755  | -1.4608763 | -1.4291782 |
| O  | 1.3477755  | 1.4608763  | -1.4291782 |
| C  | -1.3874078 | 0.0000000  | 1.9963620  |
| C  | -0.6936991 | -1.2017959 | 1.9934020  |
| C  | 0.6936991  | -1.2017959 | 1.9934020  |
| C  | 1.3874078  | -0.0000000 | 1.9963620  |
| C  | 0.6936991  | 1.2017959  | 1.9934020  |
| C  | -0.6936991 | 1.2017959  | 1.9934020  |
| Pd | 0.0000000  | 0.0000000  | -1.4283543 |
| H  | -1.2345127 | -2.1408845 | 1.9777144  |
| H  | -1.2345127 | 2.1408845  | 1.9777144  |
| H  | 1.2345127  | -2.1408845 | 1.9777144  |
| H  | 1.2345127  | 2.1408845  | 1.9777144  |
| H  | -2.4713149 | 0.0000000  | 1.9859310  |

|   |           |           |           |
|---|-----------|-----------|-----------|
| H | 2.4713149 | 0.0000000 | 1.9859310 |
|---|-----------|-----------|-----------|

**15b.**

|    |            |            |            |
|----|------------|------------|------------|
| C  | 2.5825792  | -1.2298227 | 1.3951022  |
| H  | 3.2116282  | -2.1279538 | 1.3791722  |
| C  | 3.2336626  | 0.0000000  | 1.3574583  |
| H  | 4.3143453  | 0.0000000  | 1.3158483  |
| C  | 2.5825792  | 1.2298227  | 1.3951022  |
| H  | 3.2116282  | 2.1279538  | 1.3791722  |
| O  | 1.3479046  | -1.4606447 | 1.4482116  |
| O  | 1.3479046  | 1.4606447  | 1.4482116  |
| C  | -2.5825792 | 1.2298227  | 1.3951022  |
| H  | -3.2116282 | 2.1279538  | 1.3791722  |
| C  | -3.2336626 | 0.0000000  | 1.3574583  |
| H  | -4.3143453 | -0.0000000 | 1.3158483  |
| C  | -2.5825792 | -1.2298227 | 1.3951022  |
| H  | -3.2116282 | -2.1279538 | 1.3791722  |
| O  | -1.3479046 | 1.4606447  | 1.4482116  |
| O  | -1.3479046 | -1.4606447 | 1.4482116  |
| C  | 0.0000000  | -1.3882892 | -1.9788061 |
| C  | 1.2012225  | -0.6938161 | -1.9817776 |
| C  | 1.2012225  | 0.6938161  | -1.9817776 |
| C  | 0.0000000  | 1.3882892  | -1.9788061 |
| C  | -1.2012225 | 0.6938161  | -1.9817776 |
| C  | -1.2012225 | -0.6938161 | -1.9817776 |
| H  | -2.1404995 | 1.2351057  | -1.9706533 |
| H  | -2.1404995 | -1.2351057 | -1.9706533 |
| H  | 2.1404995  | 1.2351057  | -1.9706533 |
| H  | 2.1404995  | -1.2351057 | -1.9706533 |
| H  | 0.0000000  | 2.4717668  | -1.9602864 |
| H  | -0.0000000 | -2.4717668 | -1.9602864 |
| Pd | 0.0000000  | 0.0000000  | 1.4513512  |

**16a.**

|   |            |           |            |
|---|------------|-----------|------------|
| C | -2.5847732 | 1.2288748 | -1.4450614 |
|---|------------|-----------|------------|

|    |            |            |            |
|----|------------|------------|------------|
| H  | -3.2128073 | 2.1274043  | -1.4441153 |
| C  | -3.2361205 | -0.0000000 | -1.4514525 |
| H  | -4.3172893 | -0.0000000 | -1.4486153 |
| C  | -2.5847732 | -1.2288748 | -1.4450614 |
| H  | -3.2128073 | -2.1274043 | -1.4441153 |
| O  | -1.3475489 | 1.4602035  | -1.4389246 |
| O  | -1.3475489 | -1.4602035 | -1.4389246 |
| C  | 2.5847732  | -1.2288748 | -1.4450614 |
| H  | 3.2128073  | -2.1274043 | -1.4441153 |
| C  | 3.2361205  | 0.0000000  | -1.4514525 |
| H  | 4.3172893  | -0.0000000 | -1.4486153 |
| C  | 2.5847732  | 1.2288748  | -1.4450614 |
| H  | 3.2128073  | 2.1274043  | -1.4441153 |
| O  | 1.3475489  | -1.4602035 | -1.4389246 |
| O  | 1.3475489  | 1.4602035  | -1.4389246 |
| C  | -1.3612691 | 0.0000000  | 2.0542061  |
| C  | -0.6931486 | -1.2086511 | 2.0506041  |
| C  | 0.6931486  | -1.2086511 | 2.0506041  |
| C  | 1.3612691  | 0.0000000  | 2.0542061  |
| C  | 0.6931486  | 1.2086511  | 2.0506041  |
| C  | -0.6931486 | 1.2086511  | 2.0506041  |
| Pd | 0.0000000  | 0.0000000  | -1.4381068 |
| F  | -2.7024217 | 0.0000000  | 2.0502957  |
| F  | 2.7024217  | 0.0000000  | 2.0502957  |
| H  | -1.2556139 | -2.1332826 | 2.0348070  |
| H  | -1.2556139 | 2.1332826  | 2.0348070  |
| H  | 1.2556139  | -2.1332826 | 2.0348070  |
| H  | 1.2556139  | 2.1332826  | 2.0348070  |

**16b.**

|   |           |            |           |
|---|-----------|------------|-----------|
| C | 2.5825962 | -1.2299584 | 1.3885083 |
| H | 3.2100506 | -2.1289891 | 1.3717591 |
| C | 3.2339454 | 0.0000000  | 1.3510578 |
| H | 4.3147520 | 0.0000000  | 1.3124408 |
| C | 2.5825962 | 1.2299584  | 1.3885083 |

|    |            |            |            |
|----|------------|------------|------------|
| H  | 3.2100506  | 2.1289891  | 1.3717591  |
| O  | 1.3473734  | -1.4595238 | 1.4407131  |
| O  | 1.3473734  | 1.4595238  | 1.4407131  |
| C  | -2.5825962 | 1.2299584  | 1.3885083  |
| H  | -3.2100506 | 2.1289891  | 1.3717591  |
| C  | -3.2339454 | 0.0000000  | 1.3510578  |
| H  | -4.3147520 | 0.0000000  | 1.3124408  |
| C  | -2.5825962 | -1.2299584 | 1.3885083  |
| H  | -3.2100506 | -2.1289891 | 1.3717591  |
| O  | -1.3473734 | 1.4595238  | 1.4407131  |
| O  | -1.3473734 | -1.4595238 | 1.4407131  |
| C  | 0.0000000  | -1.3635535 | -1.9694364 |
| C  | 1.2078257  | -0.6932338 | -1.9697312 |
| C  | 1.2078257  | 0.6932338  | -1.9697312 |
| C  | 0.0000000  | 1.3635535  | -1.9694364 |
| C  | -1.2078257 | 0.6932338  | -1.9697312 |
| C  | -1.2078257 | -0.6932338 | -1.9697312 |
| H  | -2.1327607 | 1.2554041  | -1.9585430 |
| H  | -2.1327607 | -1.2554041 | -1.9585430 |
| H  | 2.1327607  | 1.2554041  | -1.9585430 |
| H  | 2.1327607  | -1.2554041 | -1.9585430 |
| Pd | 0.0000000  | 0.0000000  | 1.4484209  |
| F  | 0.0000000  | 2.7017513  | -1.9636853 |
| F  | 0.0000000  | -2.7017513 | -1.9636853 |

**17a.**

|   |            |            |            |
|---|------------|------------|------------|
| C | -2.5817681 | 1.2304118  | -1.3548254 |
| H | -3.2075485 | 2.1298419  | -1.3279762 |
| C | -3.2318909 | 0.0000000  | -1.3066106 |
| H | -4.3119813 | -0.0000000 | -1.2513251 |
| C | -2.5817681 | -1.2304118 | -1.3548254 |
| H | -3.2075485 | -2.1298419 | -1.3279762 |
| O | -1.3468157 | 1.4589756  | -1.4254449 |
| O | -1.3468157 | -1.4589756 | -1.4254449 |
| C | 2.5817681  | -1.2304118 | -1.3548254 |

|    |            |            |            |
|----|------------|------------|------------|
| H  | 3.2075485  | -2.1298419 | -1.3279762 |
| C  | 3.2318909  | 0.0000000  | -1.3066106 |
| H  | 4.3119813  | -0.0000000 | -1.2513251 |
| C  | 2.5817681  | 1.2304118  | -1.3548254 |
| H  | 3.2075485  | 2.1298419  | -1.3279762 |
| O  | 1.3468157  | -1.4589756 | -1.4254449 |
| O  | 1.3468157  | 1.4589756  | -1.4254449 |
| C  | -1.3906341 | 0.0000000  | 1.9239450  |
| C  | -0.6927704 | -1.1913478 | 1.9205378  |
| C  | 0.6927704  | -1.1913478 | 1.9205378  |
| C  | 1.3906341  | 0.0000000  | 1.9239450  |
| C  | 0.6927704  | 1.1913478  | 1.9205378  |
| C  | -0.6927704 | 1.1913478  | 1.9205378  |
| F  | -1.3531348 | 2.3453910  | 1.9107011  |
| F  | -1.3531348 | -2.3453910 | 1.9107011  |
| F  | 1.3531348  | -2.3453910 | 1.9107011  |
| F  | 1.3531348  | 2.3453910  | 1.9107011  |
| H  | -2.4723105 | 0.0000000  | 1.9096362  |
| H  | 2.4723105  | -0.0000000 | 1.9096362  |
| Pd | 0.0000000  | 0.0000000  | -1.4432605 |

**17b.**

|   |            |            |           |
|---|------------|------------|-----------|
| C | 2.5838911  | -1.2294493 | 1.3680503 |
| H | 3.2109828  | -2.1276981 | 1.3404553 |
| C | 3.2339497  | 0.0000000  | 1.3428648 |
| H | 4.3139386  | -0.0000000 | 1.2921952 |
| C | 2.5838911  | 1.2294493  | 1.3680503 |
| H | 3.2109828  | 2.1276981  | 1.3404553 |
| O | 1.3469727  | -1.4604210 | 1.4156013 |
| O | 1.3469727  | 1.4604210  | 1.4156013 |
| C | -2.5838911 | 1.2294493  | 1.3680503 |
| H | -3.2109828 | 2.1276981  | 1.3404553 |
| C | -3.2339497 | 0.0000000  | 1.3428648 |
| H | -4.3139386 | 0.0000000  | 1.2921952 |
| C | -2.5838911 | -1.2294493 | 1.3680503 |

|    |            |            |            |
|----|------------|------------|------------|
| H  | -3.2109828 | -2.1276981 | 1.3404553  |
| O  | -1.3469727 | 1.4604210  | 1.4156013  |
| O  | -1.3469727 | -1.4604210 | 1.4156013  |
| C  | -0.0000000 | -1.3923663 | -1.9394066 |
| C  | 1.1897255  | -0.6927869 | -1.9425101 |
| C  | 1.1897255  | 0.6927869  | -1.9425101 |
| C  | -0.0000000 | 1.3923663  | -1.9394066 |
| C  | -1.1897255 | 0.6927869  | -1.9425101 |
| C  | -1.1897255 | -0.6927869 | -1.9425101 |
| Pd | -0.0000000 | 0.0000000  | 1.4349897  |
| F  | 2.3466441  | 1.3506686  | -1.9313089 |
| F  | 2.3466441  | -1.3506686 | -1.9313089 |
| F  | -2.3466441 | -1.3506686 | -1.9313089 |
| F  | -2.3466441 | 1.3506686  | -1.9313089 |
| H  | 0.0000000  | 2.4736486  | -1.9137242 |
| H  | -0.0000000 | -2.4736486 | -1.9137242 |

**18a.**

|   |            |            |            |
|---|------------|------------|------------|
| C | -2.5849146 | 1.2292840  | -1.4036366 |
| H | -3.2107891 | 2.1287415  | -1.4003611 |
| C | -3.2357314 | 0.0000000  | -1.4253081 |
| H | -4.3168331 | 0.0000000  | -1.4400434 |
| C | -2.5849146 | -1.2292840 | -1.4036366 |
| H | -3.2107891 | -2.1287415 | -1.4003611 |
| O | -1.3467451 | 1.4587315  | -1.3804659 |
| O | -1.3467451 | -1.4587315 | -1.3804659 |
| C | 2.5849146  | -1.2292840 | -1.4036366 |
| H | 3.2107891  | -2.1287415 | -1.4003611 |
| C | 3.2357314  | -0.0000000 | -1.4253081 |
| H | 4.3168331  | 0.0000000  | -1.4400434 |
| C | 2.5849146  | 1.2292840  | -1.4036366 |
| H | 3.2107891  | 2.1287415  | -1.4003611 |
| O | 1.3467451  | -1.4587315 | -1.3804659 |
| O | 1.3467451  | 1.4587315  | -1.3804659 |
| C | -1.3833331 | 0.0000000  | 1.9950552  |
| C | -0.6927361 | -1.2012146 | 1.9903325  |

|    |            |            |            |
|----|------------|------------|------------|
| C  | 0.6927361  | -1.2012146 | 1.9903325  |
| C  | 1.3833331  | 0.0000000  | 1.9950552  |
| C  | 0.6927361  | 1.2012146  | 1.9903325  |
| C  | -0.6927361 | 1.2012146  | 1.9903325  |
| F  | -1.3583415 | 2.3434268  | 1.9801970  |
| F  | -1.3583415 | -2.3434268 | 1.9801970  |
| F  | 1.3583415  | -2.3434268 | 1.9801970  |
| F  | 1.3583415  | 2.3434268  | 1.9801970  |
| Pd | 0.0000000  | 0.0000000  | -1.3903626 |
| F  | -2.7070410 | -0.0000000 | 1.9933458  |
| F  | 2.7070410  | 0.0000000  | 1.9933458  |

**18b.**

|   |            |            |            |
|---|------------|------------|------------|
| C | 2.5841054  | -1.2295371 | 1.3616950  |
| H | 3.2097664  | -2.1286895 | 1.3365919  |
| C | 3.2344856  | 0.0000000  | 1.3387038  |
| H | 4.3147531  | -0.0000000 | 1.2941661  |
| C | 2.5841054  | 1.2295371  | 1.3616950  |
| H | 3.2097664  | 2.1286895  | 1.3365919  |
| O | 1.3465311  | -1.4592928 | 1.4034786  |
| O | 1.3465311  | 1.4592928  | 1.4034786  |
| C | -2.5841054 | 1.2295371  | 1.3616950  |
| H | -3.2097664 | 2.1286895  | 1.3365919  |
| C | -3.2344856 | -0.0000000 | 1.3387038  |
| H | -4.3147531 | 0.0000000  | 1.2941661  |
| C | -2.5841054 | -1.2295371 | 1.3616950  |
| H | -3.2097664 | -2.1286895 | 1.3365919  |
| O | -1.3465311 | 1.4592928  | 1.4034786  |
| O | -1.3465311 | -1.4592928 | 1.4034786  |
| C | 0.0000000  | -1.3866956 | -1.9279686 |
| C | 1.1992511  | -0.6928440 | -1.9304787 |
| C | 1.1992511  | 0.6928440  | -1.9304787 |
| C | 0.0000000  | 1.3866956  | -1.9279686 |
| C | -1.1992511 | 0.6928440  | -1.9304787 |
| C | -1.1992511 | -0.6928440 | -1.9304787 |

|    |            |            |            |
|----|------------|------------|------------|
| Pd | 0.0000000  | 0.0000000  | 1.4243515  |
| F  | -0.0000000 | 2.7074705  | -1.9166718 |
| F  | -0.0000000 | -2.7074705 | -1.9166718 |
| F  | 2.3445517  | 1.3560677  | -1.9214895 |
| F  | 2.3445517  | -1.3560677 | -1.9214895 |
| F  | -2.3445517 | -1.3560677 | -1.9214895 |
| F  | -2.3445517 | 1.3560677  | -1.9214895 |

**19a.**

|   |            |            |            |
|---|------------|------------|------------|
| C | -2.5796370 | 1.2327730  | -1.3933425 |
| H | -3.2052045 | 2.1309436  | -1.3825278 |
| C | -3.2239030 | 0.0000000  | -1.3704015 |
| H | -4.3052678 | -0.0000000 | -1.3454548 |
| C | -2.5796370 | -1.2327730 | -1.3933425 |
| H | -3.2052045 | -2.1309436 | -1.3825278 |
| O | -1.3404680 | 1.4679992  | -1.4265277 |
| O | -1.3404680 | -1.4679992 | -1.4265277 |
| C | 2.5796370  | -1.2327730 | -1.3933425 |
| H | 3.2052045  | -2.1309436 | -1.3825278 |
| C | 3.2239030  | 0.0000000  | -1.3704015 |
| H | 4.3052678  | 0.0000000  | -1.3454548 |
| C | 2.5796370  | 1.2327730  | -1.3933425 |
| H | 3.2052045  | 2.1309436  | -1.3825278 |
| O | 1.3404680  | -1.4679992 | -1.4265277 |
| O | 1.3404680  | 1.4679992  | -1.4265277 |
| C | -1.3871844 | -0.0000000 | 1.9815769  |
| C | -0.6936124 | -1.2016497 | 1.9790137  |
| C | 0.6936124  | -1.2016497 | 1.9790137  |
| C | 1.3871844  | 0.0000000  | 1.9815769  |
| C | 0.6936124  | 1.2016497  | 1.9790137  |
| C | -0.6936124 | 1.2016497  | 1.9790137  |
| H | -1.2345918 | -2.1408107 | 1.9630440  |
| H | -1.2345918 | 2.1408107  | 1.9630440  |
| H | 1.2345918  | -2.1408107 | 1.9630440  |
| H | 1.2345918  | 2.1408107  | 1.9630440  |



|    |            |            |            |
|----|------------|------------|------------|
| H  | -2.4711989 | -0.0000000 | 1.9703439  |
| H  | 2.4711989  | 0.0000000  | 1.9703439  |
| Pt | 0.0000000  | 0.0000000  | -1.4307680 |

**19b.**

|    |            |            |            |
|----|------------|------------|------------|
| C  | 2.5793898  | -1.2327808 | 1.3902348  |
| H  | 3.2050143  | -2.1309277 | 1.3782532  |
| C  | 3.2235955  | 0.0000000  | 1.3649729  |
| H  | 4.3048785  | 0.0000000  | 1.3371995  |
| C  | 2.5793898  | 1.2327808  | 1.3902348  |
| H  | 3.2050143  | 2.1309277  | 1.3782532  |
| O  | 1.3403382  | -1.4681006 | 1.4269516  |
| O  | 1.3403382  | 1.4681006  | 1.4269516  |
| C  | -2.5793898 | 1.2327808  | 1.3902348  |
| H  | -3.2050143 | 2.1309277  | 1.3782532  |
| C  | -3.2235955 | 0.0000000  | 1.3649729  |
| H  | -4.3048785 | 0.0000000  | 1.3371995  |
| C  | -2.5793898 | -1.2327808 | 1.3902348  |
| H  | -3.2050143 | -2.1309277 | 1.3782532  |
| O  | -1.3403382 | 1.4681006  | 1.4269516  |
| O  | -1.3403382 | -1.4681006 | 1.4269516  |
| C  | 0.0000000  | -1.3880175 | -1.9736186 |
| C  | 1.2009866  | -0.6936909 | -1.9762739 |
| C  | 1.2009866  | 0.6936909  | -1.9762739 |
| C  | 0.0000000  | 1.3880175  | -1.9736186 |
| C  | -1.2009866 | 0.6936909  | -1.9762739 |
| C  | -1.2009866 | -0.6936909 | -1.9762739 |
| Pt | 0.0000000  | 0.0000000  | 1.4318529  |
| H  | -2.1402536 | 1.2350969  | -1.9646560 |
| H  | -2.1402536 | -1.2350969 | -1.9646560 |
| H  | 2.1402536  | 1.2350969  | -1.9646560 |
| H  | 2.1402536  | -1.2350969 | -1.9646560 |
| H  | -0.0000000 | 2.4715079  | -1.9534996 |
| H  | -0.0000000 | -2.4715079 | -1.9534996 |

**20a.**

|    |            |            |            |
|----|------------|------------|------------|
| C  | -2.5814639 | 1.2317572  | -1.4264520 |
| H  | -3.2064415 | 2.1299231  | -1.4267584 |
| C  | -3.2253635 | 0.0000000  | -1.4391173 |
| H  | -4.3066913 | -0.0000000 | -1.4444112 |
| C  | -2.5814639 | -1.2317572 | -1.4264520 |
| H  | -3.2064415 | -2.1299231 | -1.4267584 |
| O  | -1.3405984 | 1.4675417  | -1.4121768 |
| O  | -1.3405984 | -1.4675417 | -1.4121768 |
| C  | 2.5814639  | -1.2317572 | -1.4264520 |
| H  | 3.2064415  | -2.1299231 | -1.4267584 |
| C  | 3.2253635  | 0.0000000  | -1.4391173 |
| H  | 4.3066913  | 0.0000000  | -1.4444112 |
| C  | 2.5814639  | 1.2317572  | -1.4264520 |
| H  | 3.2064415  | 2.1299231  | -1.4267584 |
| O  | 1.3405984  | -1.4675417 | -1.4121768 |
| O  | 1.3405984  | 1.4675417  | -1.4121768 |
| C  | -1.3603616 | 0.0000000  | 2.0300542  |
| C  | -0.6929198 | -1.2086155 | 2.0239558  |
| C  | 0.6929198  | -1.2086155 | 2.0239558  |
| C  | 1.3603616  | 0.0000000  | 2.0300542  |
| C  | 0.6929198  | 1.2086155  | 2.0239558  |
| C  | -0.6929198 | 1.2086155  | 2.0239558  |
| H  | -1.2551919 | -2.1332327 | 2.0055214  |
| H  | -1.2551919 | 2.1332327  | 2.0055214  |
| H  | 1.2551919  | -2.1332327 | 2.0055214  |
| H  | 1.2551919  | 2.1332327  | 2.0055214  |
| Pt | 0.0000000  | 0.0000000  | -1.4117845 |
| F  | -2.7018622 | 0.0000000  | 2.0311865  |
| F  | 2.7018622  | 0.0000000  | 2.0311865  |

**20b.**

|   |           |            |           |
|---|-----------|------------|-----------|
| C | 2.5793272 | -1.2329309 | 1.3825232 |
| H | 3.2034592 | -2.1318512 | 1.3661317 |
| C | 3.2234357 | 0.0000000  | 1.3508896 |

|    |            |            |            |
|----|------------|------------|------------|
| H  | 4.3045429  | 0.0000000  | 1.3166131  |
| C  | 2.5793272  | 1.2329309  | 1.3825232  |
| H  | 3.2034592  | 2.1318512  | 1.3661317  |
| O  | 1.3401500  | -1.4672233 | 1.4283341  |
| O  | 1.3401500  | 1.4672233  | 1.4283341  |
| C  | -2.5793272 | 1.2329309  | 1.3825232  |
| H  | -3.2034592 | 2.1318512  | 1.3661317  |
| C  | -3.2234357 | 0.0000000  | 1.3508896  |
| H  | -4.3045429 | 0.0000000  | 1.3166131  |
| C  | -2.5793272 | -1.2329309 | 1.3825232  |
| H  | -3.2034592 | -2.1318512 | 1.3661317  |
| O  | -1.3401500 | 1.4672233  | 1.4283341  |
| O  | -1.3401500 | -1.4672233 | 1.4283341  |
| C  | 0.0000000  | -1.3631912 | -1.9610971 |
| C  | 1.2075636  | -0.6930940 | -1.9625069 |
| C  | 1.2075636  | 0.6930940  | -1.9625069 |
| C  | 0.0000000  | 1.3631912  | -1.9610971 |
| C  | -1.2075636 | 0.6930940  | -1.9625069 |
| C  | -1.2075636 | -0.6930940 | -1.9625069 |
| Pt | 0.0000000  | 0.0000000  | 1.4364835  |
| F  | -0.0000000 | -2.7017775 | -1.9517689 |
| F  | 0.0000000  | 2.7017775  | -1.9517689 |
| H  | -2.1324430 | 1.2553690  | -1.9509213 |
| H  | -2.1324430 | -1.2553690 | -1.9509213 |
| H  | 2.1324430  | 1.2553690  | -1.9509213 |
| H  | 2.1324430  | -1.2553690 | -1.9509213 |

**21a.**

|   |            |            |            |
|---|------------|------------|------------|
| C | -2.5788801 | 1.2334034  | -1.3551418 |
| H | -3.2016470 | 2.1326100  | -1.3305856 |
| C | -3.2216994 | 0.0000000  | -1.3118449 |
| H | -4.3021117 | 0.0000000  | -1.2605972 |
| C | -2.5788801 | -1.2334034 | -1.3551418 |
| H | -3.2016470 | -2.1326100 | -1.3305856 |
| O | -1.3399259 | 1.4669686  | -1.4190450 |

|    |            |            |            |
|----|------------|------------|------------|
| O  | -1.3399259 | -1.4669686 | -1.4190450 |
| C  | 2.5788801  | -1.2334034 | -1.3551418 |
| H  | 3.2016470  | -2.1326100 | -1.3305856 |
| C  | 3.2216994  | 0.0000000  | -1.3118449 |
| H  | 4.3021117  | 0.0000000  | -1.2605972 |
| C  | 2.5788801  | 1.2334034  | -1.3551418 |
| H  | 3.2016470  | 2.1326100  | -1.3305856 |
| O  | 1.3399259  | -1.4669686 | -1.4190450 |
| O  | 1.3399259  | 1.4669686  | -1.4190450 |
| C  | -1.3902759 | 0.0000000  | 1.9253605  |
| C  | -0.6925469 | -1.1910131 | 1.9215806  |
| C  | 0.6925469  | -1.1910131 | 1.9215806  |
| C  | 1.3902759  | 0.0000000  | 1.9253605  |
| C  | 0.6925469  | 1.1910131  | 1.9215806  |
| C  | -0.6925469 | 1.1910131  | 1.9215806  |
| Pt | 0.0000000  | 0.0000000  | -1.4337330 |
| F  | -1.3530905 | -2.3455117 | 1.9099155  |
| F  | 1.3530905  | -2.3455117 | 1.9099155  |
| F  | 1.3530905  | 2.3455117  | 1.9099155  |
| F  | -1.3530905 | 2.3455117  | 1.9099155  |
| H  | -2.4719092 | 0.0000000  | 1.9105007  |
| H  | 2.4719092  | 0.0000000  | 1.9105007  |

**21b.**

|   |            |            |           |
|---|------------|------------|-----------|
| C | 2.5810917  | 1.2324917  | 1.3712609 |
| H | 3.2054202  | 2.1304942  | 1.3504770 |
| C | 3.2239699  | 0.0000000  | 1.3572328 |
| H | 4.3047382  | 0.0000000  | 1.3212100 |
| C | 2.5810917  | -1.2324917 | 1.3712609 |
| H | 3.2054202  | -2.1304942 | 1.3504770 |
| O | 1.3400477  | 1.4683786  | 1.4011419 |
| O | 1.3400477  | -1.4683786 | 1.4011419 |
| C | -2.5810917 | -1.2324917 | 1.3712609 |
| H | -3.2054202 | -2.1304942 | 1.3504770 |
| C | -3.2239699 | 0.0000000  | 1.3572328 |

|    |            |            |            |
|----|------------|------------|------------|
| H  | -4.3047382 | 0.0000000  | 1.3212100  |
| C  | -2.5810917 | 1.2324917  | 1.3712609  |
| H  | -3.2054202 | 2.1304942  | 1.3504770  |
| O  | -1.3400477 | -1.4683786 | 1.4011419  |
| O  | -1.3400477 | 1.4683786  | 1.4011419  |
| C  | -0.0000000 | 1.3922542  | -1.9470960 |
| C  | 1.1892940  | 0.6925882  | -1.9485296 |
| C  | 1.1892940  | -0.6925882 | -1.9485296 |
| C  | -0.0000000 | -1.3922542 | -1.9470960 |
| C  | -1.1892940 | -0.6925882 | -1.9485296 |
| C  | -1.1892940 | 0.6925882  | -1.9485296 |
| Pt | -0.0000000 | 0.0000000  | 1.4142882  |
| F  | 2.3468182  | 1.3503948  | -1.9338325 |
| F  | 2.3468182  | -1.3503948 | -1.9338325 |
| F  | -2.3468182 | -1.3503948 | -1.9338325 |
| F  | -2.3468182 | 1.3503948  | -1.9338325 |
| H  | 0.0000000  | 2.4735236  | -1.9195264 |
| H  | 0.0000000  | -2.4735236 | -1.9195264 |

**22a.**

|   |            |            |            |
|---|------------|------------|------------|
| C | -2.5818309 | 1.2324215  | -1.3929371 |
| H | -3.2047681 | 2.1315279  | -1.3836550 |
| C | -3.2251992 | -0.0000000 | -1.3951260 |
| H | -4.3065123 | 0.0000000  | -1.3849223 |
| C | -2.5818309 | -1.2324215 | -1.3929371 |
| H | -3.2047681 | -2.1315279 | -1.3836550 |
| O | -1.3399375 | 1.4671281  | -1.3953035 |
| O | -1.3399375 | -1.4671281 | -1.3953035 |
| C | 2.5818309  | -1.2324215 | -1.3929371 |
| H | 3.2047681  | -2.1315279 | -1.3836550 |
| C | 3.2251992  | -0.0000000 | -1.3951260 |
| H | 4.3065123  | 0.0000000  | -1.3849223 |
| C | 2.5818309  | 1.2324215  | -1.3929371 |
| H | 3.2047681  | 2.1315279  | -1.3836550 |
| O | 1.3399375  | -1.4671281 | -1.3953035 |

|    |            |            |            |
|----|------------|------------|------------|
| O  | 1.3399375  | 1.4671281  | -1.3953035 |
| C  | -1.3827952 | 0.0000000  | 1.9806128  |
| C  | -0.6924907 | -1.2008062 | 1.9735928  |
| C  | 0.6924907  | -1.2008062 | 1.9735928  |
| C  | 1.3827952  | 0.0000000  | 1.9806128  |
| C  | 0.6924907  | 1.2008062  | 1.9735928  |
| C  | -0.6924907 | 1.2008062  | 1.9735928  |
| Pt | 0.0000000  | 0.0000000  | -1.4023691 |
| F  | -2.7068833 | 0.0000000  | 1.9805684  |
| F  | 2.7068833  | -0.0000000 | 1.9805684  |
| F  | -1.3584336 | -2.3433507 | 1.9583285  |
| F  | 1.3584336  | -2.3433507 | 1.9583285  |
| F  | 1.3584336  | 2.3433507  | 1.9583285  |
| F  | -1.3584336 | 2.3433507  | 1.9583285  |

**22b.**

|   |            |            |            |
|---|------------|------------|------------|
| C | 2.5808294  | -1.2326261 | 1.3609355  |
| H | 3.2037318  | -2.1313820 | 1.3371576  |
| C | 3.2233983  | 0.0000000  | 1.3337245  |
| H | 4.3036650  | -0.0000000 | 1.2852223  |
| C | 2.5808294  | 1.2326261  | 1.3609355  |
| H | 3.2037318  | 2.1313820  | 1.3371576  |
| O | 1.3399107  | -1.4676115 | 1.4066127  |
| O | 1.3399107  | 1.4676115  | 1.4066127  |
| C | -2.5808294 | 1.2326261  | 1.3609355  |
| H | -3.2037318 | 2.1313820  | 1.3371576  |
| C | -3.2233983 | 0.0000000  | 1.3337245  |
| H | -4.3036650 | 0.0000000  | 1.2852223  |
| C | -2.5808294 | -1.2326261 | 1.3609355  |
| H | -3.2037318 | -2.1313820 | 1.3371576  |
| O | -1.3399107 | 1.4676115  | 1.4066127  |
| O | -1.3399107 | -1.4676115 | 1.4066127  |
| C | 0.0000000  | -1.3863648 | -1.9282944 |
| C | 1.1987358  | -0.6926056 | -1.9302227 |
| C | 1.1987358  | 0.6926056  | -1.9302227 |

|    |            |            |            |
|----|------------|------------|------------|
| C  | 0.0000000  | 1.3863648  | -1.9282944 |
| C  | -1.1987358 | 0.6926056  | -1.9302227 |
| C  | -1.1987358 | -0.6926056 | -1.9302227 |
| Pt | 0.0000000  | 0.0000000  | 1.4214731  |
| F  | 2.3445591  | -1.3559058 | -1.9180195 |
| F  | 2.3445591  | 1.3559058  | -1.9180195 |
| F  | -2.3445591 | 1.3559058  | -1.9180195 |
| F  | -2.3445591 | -1.3559058 | -1.9180195 |
| F  | 0.0000000  | -2.7075857 | -1.9143160 |
| F  | 0.0000000  | 2.7075857  | -1.9143160 |

**23a.**

|   |            |            |            |
|---|------------|------------|------------|
| C | 2.5048640  | 1.2072568  | -3.2149885 |
| H | 3.0885378  | 2.1354869  | -3.2128066 |
| C | 3.1918916  | 0.0000000  | -3.2162865 |
| H | 4.2723375  | 0.0000000  | -3.2085708 |
| C | 2.5048640  | -1.2072568 | -3.2149885 |
| H | 3.0885378  | -2.1354869 | -3.2128066 |
| O | 1.2568339  | 1.3674200  | -3.2163552 |
| O | 1.2568339  | -1.3674200 | -3.2163552 |
| C | -2.5048640 | -1.2072568 | -3.2149885 |
| H | -3.0885378 | -2.1354869 | -3.2128066 |
| C | -3.1918916 | 0.0000000  | -3.2162865 |
| H | -4.2723375 | 0.0000000  | -3.2085708 |
| C | -2.5048640 | 1.2072568  | -3.2149885 |
| H | -3.0885378 | 2.1354869  | -3.2128066 |
| O | -1.2568339 | -1.3674200 | -3.2163552 |
| O | -1.2568339 | 1.3674200  | -3.2163552 |
| C | 2.5079274  | 1.2081248  | 0.5155403  |
| H | 3.0945542  | 2.1348148  | 0.5280635  |
| C | 3.1921410  | 0.0000000  | 0.5715135  |
| H | 4.2715971  | 0.0000000  | 0.6219630  |
| C | 2.5079274  | -1.2081248 | 0.5155403  |
| H | 3.0945542  | -2.1348148 | 0.5280635  |
| O | 1.2631091  | 1.3706180  | 0.4454349  |

|    |            |            |            |
|----|------------|------------|------------|
| O  | 1.2631091  | -1.3706180 | 0.4454349  |
| C  | -2.5079274 | -1.2081248 | 0.5155403  |
| H  | -3.0945542 | -2.1348148 | 0.5280635  |
| C  | -3.1921410 | 0.0000000  | 0.5715135  |
| H  | -4.2715971 | 0.0000000  | 0.6219630  |
| C  | -2.5079274 | 1.2081248  | 0.5155403  |
| H  | -3.0945542 | 2.1348148  | 0.5280635  |
| O  | -1.2631091 | -1.3706180 | 0.4454349  |
| O  | -1.2631091 | 1.3706180  | 0.4454349  |
| C  | 0.6936974  | 1.2016807  | 3.8270813  |
| C  | -0.6936974 | 1.2016807  | 3.8270813  |
| C  | -1.3875572 | 0.0000000  | 3.8318595  |
| C  | -0.6936974 | -1.2016807 | 3.8270813  |
| C  | 0.6936974  | -1.2016807 | 3.8270813  |
| C  | 1.3875572  | 0.0000000  | 3.8318595  |
| H  | 1.2344040  | 2.1408801  | 3.8086689  |
| H  | -1.2344040 | 2.1408801  | 3.8086689  |
| H  | -1.2344040 | -2.1408801 | 3.8086689  |
| H  | 1.2344040  | -2.1408801 | 3.8086689  |
| H  | 2.4713290  | 0.0000000  | 3.8204256  |
| H  | -2.4713290 | 0.0000000  | 3.8204256  |
| Ni | 0.0000000  | 0.0000000  | 0.4457904  |
| Ni | 0.0000000  | 0.0000000  | -3.2101530 |

**23b.**

|   |            |            |            |
|---|------------|------------|------------|
| C | 2.5043779  | 1.2073035  | -3.2417003 |
| H | 3.0881924  | 2.1353953  | -3.2339079 |
| C | 3.1912241  | -0.0000000 | -3.2243057 |
| H | 4.2713238  | 0.0000000  | -3.1945451 |
| C | 2.5043779  | -1.2073035 | -3.2417003 |
| H | 3.0881924  | -2.1353953 | -3.2339079 |
| O | 1.2565962  | 1.3674205  | -3.2685214 |
| O | 1.2565962  | -1.3674205 | -3.2685214 |
| C | -2.5043779 | -1.2073035 | -3.2417003 |
| H | -3.0881924 | -2.1353953 | -3.2339079 |



|    |            |            |            |
|----|------------|------------|------------|
| C  | -3.1912241 | 0.0000000  | -3.2243057 |
| H  | -4.2713238 | 0.0000000  | -3.1945451 |
| C  | -2.5043779 | 1.2073035  | -3.2417003 |
| H  | -3.0881924 | 2.1353953  | -3.2339079 |
| O  | -1.2565962 | -1.3674205 | -3.2685214 |
| O  | -1.2565962 | 1.3674205  | -3.2685214 |
| Ni | 0.0000000  | 0.0000000  | -3.2648053 |
| C  | 2.5063272  | 1.2079272  | 0.5392503  |
| H  | 3.0924960  | 2.1346968  | 0.5628126  |
| C  | 3.1889186  | -0.0000000 | 0.6153037  |
| H  | 4.2665414  | 0.0000000  | 0.6956873  |
| C  | 2.5063272  | -1.2079272 | 0.5392503  |
| H  | 3.0924960  | -2.1346968 | 0.5628126  |
| O  | 1.2635019  | 1.3701559  | 0.4386016  |
| O  | 1.2635019  | -1.3701559 | 0.4386016  |
| C  | -2.5063272 | -1.2079272 | 0.5392503  |
| H  | -3.0924960 | -2.1346968 | 0.5628126  |
| C  | -3.1889186 | 0.0000000  | 0.6153037  |
| H  | -4.2665414 | -0.0000000 | 0.6956873  |
| C  | -2.5063272 | 1.2079272  | 0.5392503  |
| H  | -3.0924960 | 2.1346968  | 0.5628126  |
| O  | -1.2635019 | -1.3701559 | 0.4386016  |
| O  | -1.2635019 | 1.3701559  | 0.4386016  |
| Ni | 0.0000000  | 0.0000000  | 0.4345900  |
| C  | 1.2009765  | -0.6936994 | 3.8308508  |
| C  | 1.2009765  | 0.6936994  | 3.8308508  |
| C  | 0.0000000  | 1.3882917  | 3.8275016  |
| C  | -1.2009765 | 0.6936994  | 3.8308508  |
| C  | -1.2009765 | -0.6936994 | 3.8308508  |
| C  | 0.0000000  | -1.3882917 | 3.8275016  |
| H  | 2.1404505  | -1.2343764 | 3.8174442  |
| H  | 2.1404505  | 1.2343764  | 3.8174442  |
| H  | 0.0000000  | 2.4716292  | 3.8058057  |
| H  | -2.1404505 | 1.2343764  | 3.8174442  |
| H  | -2.1404505 | -1.2343764 | 3.8174442  |

|   |           |            |           |
|---|-----------|------------|-----------|
| H | 0.0000000 | -2.4716292 | 3.8058057 |
|---|-----------|------------|-----------|

**24a.**

|   |            |            |            |
|---|------------|------------|------------|
| C | 2.5050579  | 1.2070125  | -3.2403628 |
| H | 3.0883994  | 2.1353883  | -3.2472054 |
| C | 3.1916945  | 0.0000000  | -3.2681862 |
| H | 4.2719226  | 0.0000000  | -3.2914791 |
| C | 2.5050579  | -1.2070125 | -3.2403628 |
| H | 3.0883994  | -2.1353883 | -3.2472054 |
| O | 1.2572773  | 1.3670226  | -3.2052014 |
| O | 1.2572773  | -1.3670226 | -3.2052014 |
| C | -2.5050579 | -1.2070125 | -3.2403628 |
| H | -3.0883994 | -2.1353883 | -3.2472054 |
| C | -3.1916945 | 0.0000000  | -3.2681862 |
| H | -4.2719226 | 0.0000000  | -3.2914791 |
| C | -2.5050579 | 1.2070125  | -3.2403628 |
| H | -3.0883994 | 2.1353883  | -3.2472054 |
| O | -1.2572773 | -1.3670226 | -3.2052014 |
| O | -1.2572773 | 1.3670226  | -3.2052014 |
| C | 2.5096549  | 1.2074134  | 0.4899191  |
| H | 3.0956734  | 2.1341630  | 0.4930122  |
| C | 3.1948583  | -0.0000000 | 0.4929402  |
| H | 4.2751082  | 0.0000000  | 0.5014222  |
| C | 2.5096549  | -1.2074134 | 0.4899191  |
| H | 3.0956734  | -2.1341630 | 0.4930122  |
| O | 1.2613919  | 1.3706119  | 0.4851698  |
| O | 1.2613919  | -1.3706119 | 0.4851698  |
| C | -2.5096549 | -1.2074134 | 0.4899191  |
| H | -3.0956734 | -2.1341630 | 0.4930122  |
| C | -3.1948583 | 0.0000000  | 0.4929402  |
| H | -4.2751082 | 0.0000000  | 0.5014222  |
| C | -2.5096549 | 1.2074134  | 0.4899191  |
| H | -3.0956734 | 2.1341630  | 0.4930122  |
| O | -1.2613919 | -1.3706119 | 0.4851698  |
| O | -1.2613919 | 1.3706119  | 0.4851698  |

|    |            |            |            |
|----|------------|------------|------------|
| C  | 0.6930780  | 1.2083628  | 3.8976545  |
| C  | -0.6930780 | 1.2083628  | 3.8976545  |
| C  | -1.3615346 | 0.0000000  | 3.9064428  |
| C  | -0.6930780 | -1.2083628 | 3.8976545  |
| C  | 0.6930780  | -1.2083628 | 3.8976545  |
| C  | 1.3615346  | 0.0000000  | 3.9064428  |
| F  | 2.7024752  | 0.0000000  | 3.9125610  |
| F  | -2.7024752 | 0.0000000  | 3.9125610  |
| Ni | 0.0000000  | 0.0000000  | 0.4827208  |
| Ni | 0.0000000  | 0.0000000  | -3.1957113 |
| H  | 1.2547783  | 2.1331652  | 3.8784111  |
| H  | -1.2547783 | 2.1331652  | 3.8784111  |
| H  | -1.2547783 | -2.1331652 | 3.8784111  |
| H  | 1.2547783  | -2.1331652 | 3.8784111  |

**24b.**

|   |            |            |            |
|---|------------|------------|------------|
| C | 2.5046013  | 1.2073291  | -3.2041669 |
| H | 3.0877745  | 2.1358271  | -3.1975578 |
| C | 3.1915296  | 0.0000000  | -3.1889234 |
| H | 4.2717441  | 0.0000000  | -3.1653243 |
| C | 2.5046013  | -1.2073291 | -3.2041669 |
| H | 3.0877745  | -2.1358271 | -3.1975578 |
| O | 1.2567106  | 1.3671327  | -3.2271457 |
| O | 1.2567106  | -1.3671327 | -3.2271457 |
| C | -2.5046013 | -1.2073291 | -3.2041669 |
| H | -3.0877745 | -2.1358271 | -3.1975578 |
| C | -3.1915296 | 0.0000000  | -3.1889234 |
| H | -4.2717441 | 0.0000000  | -3.1653243 |
| C | -2.5046013 | 1.2073291  | -3.2041669 |
| H | -3.0877745 | 2.1358271  | -3.1975578 |
| O | -1.2567106 | -1.3671327 | -3.2271457 |
| O | -1.2567106 | 1.3671327  | -3.2271457 |
| C | 2.5069729  | 1.2081716  | 0.5256716  |
| H | 3.0918600  | 2.1356539  | 0.5446868  |
| C | 3.1898834  | 0.0000000  | 0.6000171  |

|    |            |            |            |
|----|------------|------------|------------|
| H  | 4.2683155  | 0.0000000  | 0.6690484  |
| C  | 2.5069729  | -1.2081716 | 0.5256716  |
| H  | 3.0918600  | -2.1356539 | 0.5446868  |
| O  | 1.2632299  | 1.3692928  | 0.4314344  |
| O  | 1.2632299  | -1.3692928 | 0.4314344  |
| C  | -2.5069729 | -1.2081716 | 0.5256716  |
| H  | -3.0918600 | -2.1356539 | 0.5446868  |
| C  | -3.1898834 | 0.0000000  | 0.6000171  |
| H  | -4.2683155 | 0.0000000  | 0.6690484  |
| C  | -2.5069729 | 1.2081716  | 0.5256716  |
| H  | -3.0918600 | 2.1356539  | 0.5446868  |
| O  | -1.2632299 | -1.3692928 | 0.4314344  |
| O  | -1.2632299 | 1.3692928  | 0.4314344  |
| C  | 1.2074749  | -0.6931563 | 3.7955145  |
| C  | 1.2074749  | 0.6931563  | 3.7955145  |
| C  | 0.0000000  | 1.3638269  | 3.7952636  |
| C  | -1.2074749 | 0.6931563  | 3.7955145  |
| C  | -1.2074749 | -0.6931563 | 3.7955145  |
| C  | 0.0000000  | -1.3638269 | 3.7952636  |
| H  | 2.1327305  | -1.2545386 | 3.7818885  |
| H  | 2.1327305  | 1.2545386  | 3.7818885  |
| H  | -2.1327305 | 1.2545386  | 3.7818885  |
| H  | -2.1327305 | -1.2545386 | 3.7818885  |
| F  | 0.0000000  | 2.7020104  | 3.7892466  |
| F  | 0.0000000  | -2.7020104 | 3.7892466  |
| Ni | 0.0000000  | 0.0000000  | 0.4234622  |
| Ni | 0.0000000  | 0.0000000  | -3.2234201 |

**25a.**

|   |           |            |            |
|---|-----------|------------|------------|
| C | 2.5047848 | 1.2073679  | -3.1843026 |
| H | 3.0880184 | 2.1358051  | -3.1796641 |
| C | 3.1917801 | 0.0000000  | -3.1755734 |
| H | 4.2721357 | 0.0000000  | -3.1587738 |
| C | 2.5047848 | -1.2073679 | -3.1843026 |
| H | 3.0880184 | -2.1358051 | -3.1796641 |

|   |            |            |            |
|---|------------|------------|------------|
| O | 1.2566733  | 1.3671458  | -3.1983605 |
| O | 1.2566733  | -1.3671458 | -3.1983605 |
| C | -2.5047848 | -1.2073679 | -3.1843026 |
| H | -3.0880184 | -2.1358051 | -3.1796641 |
| C | -3.1917801 | 0.0000000  | -3.1755734 |
| H | -4.2721357 | 0.0000000  | -3.1587738 |
| C | -2.5047848 | 1.2073679  | -3.1843026 |
| H | -3.0880184 | 2.1358051  | -3.1796641 |
| O | -1.2566733 | -1.3671458 | -3.1983605 |
| O | -1.2566733 | 1.3671458  | -3.1983605 |
| C | 2.5069454  | 1.2089528  | 0.5484509  |
| H | 3.0901215  | 2.1366820  | 0.5759967  |
| C | 3.1891738  | 0.0000000  | 0.6213205  |
| H | 4.2673533  | 0.0000000  | 0.6946487  |
| C | 2.5069454  | -1.2089528 | 0.5484509  |
| H | 3.0901215  | -2.1366820 | 0.5759967  |
| O | 1.2627750  | 1.3691207  | 0.4510988  |
| O | 1.2627750  | -1.3691207 | 0.4510988  |
| C | -2.5069454 | -1.2089528 | 0.5484509  |
| H | -3.0901215 | -2.1366820 | 0.5759967  |
| C | -3.1891738 | 0.0000000  | 0.6213205  |
| H | -4.2673533 | -0.0000000 | 0.6946487  |
| C | -2.5069454 | 1.2089528  | 0.5484509  |
| H | -3.0901215 | 2.1366820  | 0.5759967  |
| O | -1.2627750 | -1.3691207 | 0.4510988  |
| O | -1.2627750 | 1.3691207  | 0.4510988  |
| C | 0.6927009  | 1.1913722  | 3.7340875  |
| C | -0.6927009 | 1.1913722  | 3.7340875  |
| C | -1.3903305 | 0.0000000  | 3.7389462  |
| C | -0.6927009 | -1.1913722 | 3.7340875  |
| C | 0.6927009  | -1.1913722 | 3.7340875  |
| C | 1.3903305  | 0.0000000  | 3.7389462  |
| F | -1.3536151 | 2.3451655  | 3.7222114  |
| F | 1.3536151  | 2.3451655  | 3.7222114  |
| F | -1.3536151 | -2.3451655 | 3.7222114  |

|    |            |            |            |
|----|------------|------------|------------|
| F  | 1.3536151  | -2.3451655 | 3.7222114  |
| H  | -2.4716940 | 0.0000000  | 3.7215585  |
| H  | -2.4716940 | 0.0000000  | 3.7215585  |
| H  | 2.4716940  | 0.0000000  | 3.7215585  |
| Ni | 0.0000000  | 0.0000000  | 0.4322624  |
| Ni | 0.0000000  | 0.0000000  | -3.1945888 |

**25b.**

|   |            |            |            |
|---|------------|------------|------------|
| C | 2.5051465  | 1.2071514  | -3.2025290 |
| H | 3.0885688  | 2.1354816  | -3.2035010 |
| C | 3.1921212  | 0.0000000  | -3.2136978 |
| H | 4.2725748  | 0.0000000  | -3.2175515 |
| C | 2.5051465  | -1.2071514 | -3.2025290 |
| H | 3.0885688  | -2.1354816 | -3.2035010 |
| O | 1.2569234  | 1.3671546  | -3.1902638 |
| O | 1.2569234  | -1.3671546 | -3.1902638 |
| C | -2.5051465 | -1.2071514 | -3.2025290 |
| H | -3.0885688 | -2.1354816 | -3.2035010 |
| C | -3.1921212 | 0.0000000  | -3.2136978 |
| H | -4.2725748 | 0.0000000  | -3.2175515 |
| C | -2.5051465 | 1.2071514  | -3.2025290 |
| H | -3.0885688 | 2.1354816  | -3.2035010 |
| O | -1.2569234 | -1.3671546 | -3.1902638 |
| O | -1.2569234 | 1.3671546  | -3.1902638 |
| C | 2.5098695  | 1.2079139  | 0.5316663  |
| H | 3.0945482  | 2.1346327  | 0.5545559  |
| C | 3.1935173  | 0.0000000  | 0.5658905  |
| H | 4.2725622  | 0.0000000  | 0.6175688  |
| C | 2.5098695  | -1.2079139 | 0.5316663  |
| H | 3.0945482  | -2.1346327 | 0.5545559  |
| O | 1.2619858  | 1.3706510  | 0.4787398  |
| O | 1.2619858  | -1.3706510 | 0.4787398  |
| C | -2.5098695 | -1.2079139 | 0.5316663  |
| H | -3.0945482 | -2.1346327 | 0.5545559  |
| C | -3.1935173 | 0.0000000  | 0.5658905  |

|    |            |            |            |
|----|------------|------------|------------|
| H  | -4.2725622 | 0.0000000  | 0.6175688  |
| C  | -2.5098695 | 1.2079139  | 0.5316663  |
| H  | -3.0945482 | 2.1346327  | 0.5545559  |
| O  | -1.2619858 | -1.3706510 | 0.4787398  |
| O  | -1.2619858 | 1.3706510  | 0.4787398  |
| C  | 1.1899604  | -0.6927565 | 3.7876789  |
| C  | 1.1899604  | 0.6927565  | 3.7876789  |
| C  | 0.0000000  | 1.3918736  | 3.7819791  |
| C  | -1.1899604 | 0.6927565  | 3.7876789  |
| C  | -1.1899604 | -0.6927565 | 3.7876789  |
| C  | 0.0000000  | -1.3918736 | 3.7819791  |
| F  | 2.3462082  | 1.3517685  | 3.7806886  |
| F  | 2.3462082  | -1.3517685 | 3.7806886  |
| F  | -2.3462082 | 1.3517685  | 3.7806886  |
| F  | -2.3462082 | -1.3517685 | 3.7806886  |
| H  | 0.0000000  | 2.4730051  | 3.7534616  |
| H  | 0.0000000  | -2.4730051 | 3.7534616  |
| Ni | 0.0000000  | 0.0000000  | 0.4603744  |
| Ni | 0.0000000  | 0.0000000  | -3.1838183 |

**26a.**

|   |            |            |            |
|---|------------|------------|------------|
| C | 2.5051823  | 1.2070866  | -3.2172423 |
| H | 3.0882474  | 2.1355819  | -3.2246093 |
| C | 3.1918649  | 0.0000000  | -3.2428810 |
| H | 4.2721038  | 0.0000000  | -3.2657544 |
| C | 2.5051823  | -1.2070866 | -3.2172423 |
| H | 3.0882474  | -2.1355819 | -3.2246093 |
| O | 1.2572098  | 1.3668432  | -3.1836346 |
| O | 1.2572098  | -1.3668432 | -3.1836346 |
| C | -2.5051823 | -1.2070866 | -3.2172423 |
| H | -3.0882474 | -2.1355819 | -3.2246093 |
| C | -3.1918649 | 0.0000000  | -3.2428810 |
| H | -4.2721038 | 0.0000000  | -3.2657544 |
| C | -2.5051823 | 1.2070866  | -3.2172423 |
| H | -3.0882474 | 2.1355819  | -3.2246093 |

|    |            |            |            |
|----|------------|------------|------------|
| O  | -1.2572098 | -1.3668432 | -3.1836346 |
| O  | -1.2572098 | 1.3668432  | -3.1836346 |
| C  | 2.5101509  | 1.2079315  | 0.5153443  |
| H  | 3.0932641  | 2.1357476  | 0.5269199  |
| C  | 3.1948967  | 0.0000000  | 0.5176552  |
| H  | 4.2751007  | 0.0000000  | 0.5298257  |
| C  | 2.5101509  | -1.2079315 | 0.5153443  |
| H  | 3.0932641  | -2.1357476 | 0.5269199  |
| O  | 1.2606575  | 1.3691798  | 0.5071509  |
| O  | 1.2606575  | -1.3691798 | 0.5071509  |
| C  | -2.5101509 | -1.2079315 | 0.5153443  |
| H  | -3.0932641 | -2.1357476 | 0.5269199  |
| C  | -3.1948967 | -0.0000000 | 0.5176552  |
| H  | -4.2751007 | 0.0000000  | 0.5298257  |
| C  | -2.5101509 | 1.2079315  | 0.5153443  |
| H  | -3.0932641 | 2.1357476  | 0.5269199  |
| O  | -1.2606575 | -1.3691798 | 0.5071509  |
| O  | -1.2606575 | 1.3691798  | 0.5071509  |
| C  | 0.6927237  | 1.2011353  | 3.8235710  |
| C  | -0.6927237 | 1.2011353  | 3.8235710  |
| C  | -1.3834203 | 0.0000000  | 3.8335916  |
| C  | -0.6927237 | -1.2011353 | 3.8235710  |
| C  | 0.6927237  | -1.2011353 | 3.8235710  |
| C  | 1.3834203  | 0.0000000  | 3.8335916  |
| F  | -1.3584400 | 2.3432918  | 3.8144431  |
| F  | 1.3584400  | 2.3432918  | 3.8144431  |
| F  | -1.3584400 | -2.3432918 | 3.8144431  |
| F  | 1.3584400  | -2.3432918 | 3.8144431  |
| F  | 2.7068548  | 0.0000000  | 3.8464406  |
| F  | -2.7068548 | 0.0000000  | 3.8464406  |
| Ni | 0.0000000  | 0.0000000  | 0.4895573  |
| Ni | 0.0000000  | 0.0000000  | -3.1750846 |

**26b.**

|   |           |           |            |
|---|-----------|-----------|------------|
| C | 2.5051911 | 1.2071560 | -3.1988889 |
|---|-----------|-----------|------------|



|   |            |            |            |
|---|------------|------------|------------|
| H | 3.0882506  | 2.1356771  | -3.2045364 |
| C | 3.1920502  | 0.0000000  | -3.2199481 |
| H | 4.2723974  | 0.0000000  | -3.2374743 |
| C | 2.5051911  | -1.2071560 | -3.1988889 |
| H | 3.0882506  | -2.1356771 | -3.2045364 |
| O | 1.2570947  | 1.3669135  | -3.1716824 |
| O | 1.2570947  | -1.3669135 | -3.1716824 |
| C | -2.5051911 | -1.2071560 | -3.1988889 |
| H | -3.0882506 | -2.1356771 | -3.2045364 |
| C | -3.1920502 | 0.0000000  | -3.2199481 |
| H | -4.2723974 | -0.0000000 | -3.2374743 |
| C | -2.5051911 | 1.2071560  | -3.1988889 |
| H | -3.0882506 | 2.1356771  | -3.2045364 |
| O | -1.2570947 | -1.3669135 | -3.1716824 |
| O | -1.2570947 | 1.3669135  | -3.1716824 |
| C | 2.5101144  | 1.2081412  | 0.5356829  |
| H | 3.0933652  | 2.1356174  | 0.5559412  |
| C | 3.1942669  | 0.0000000  | 0.5605560  |
| H | 4.2738950  | 0.0000000  | 0.5985797  |
| C | 2.5101144  | -1.2081412 | 0.5356829  |
| H | 3.0933652  | -2.1356174 | 0.5559412  |
| O | 1.2612855  | 1.3697099  | 0.4966595  |
| O | 1.2612855  | -1.3697099 | 0.4966595  |
| C | -2.5101144 | -1.2081412 | 0.5356829  |
| H | -3.0933652 | -2.1356174 | 0.5559412  |
| C | -3.1942669 | 0.0000000  | 0.5605560  |
| H | -4.2738950 | 0.0000000  | 0.5985797  |
| C | -2.5101144 | 1.2081412  | 0.5356829  |
| H | -3.0933652 | 2.1356174  | 0.5559412  |
| O | -1.2612855 | -1.3697099 | 0.4966595  |
| O | -1.2612855 | 1.3697099  | 0.4966595  |
| C | 1.1993101  | -0.6928397 | 3.7742725  |
| C | 1.1993101  | 0.6928397  | 3.7742725  |
| C | -0.0000000 | 1.3865777  | 3.7688009  |
| C | -1.1993101 | 0.6928397  | 3.7742725  |

|    |            |            |            |
|----|------------|------------|------------|
| C  | -1.1993101 | -0.6928397 | 3.7742725  |
| C  | 0.0000000  | -1.3865777 | 3.7688009  |
| F  | 0.0000000  | 2.7072158  | 3.7573376  |
| F  | 0.0000000  | -2.7072158 | 3.7573376  |
| Ni | 0.0000000  | 0.0000000  | 0.4740850  |
| Ni | 0.0000000  | 0.0000000  | -3.1640020 |
| F  | 2.3440783  | 1.3569217  | 3.7711049  |
| F  | 2.3440783  | -1.3569217 | 3.7711049  |
| F  | -2.3440783 | 1.3569217  | 3.7711049  |
| F  | -2.3440783 | -1.3569217 | 3.7711049  |

**27a.**

|   |            |            |            |
|---|------------|------------|------------|
| C | 2.5843282  | 1.2288175  | -3.2143481 |
| H | 3.2117809  | 2.1282358  | -3.2177437 |
| C | 3.2369830  | 0.0000000  | -3.2250935 |
| H | 4.3182657  | 0.0000000  | -3.2319162 |
| C | 2.5843282  | -1.2288175 | -3.2143481 |
| H | 3.2117809  | -2.1282358 | -3.2177437 |
| O | 1.3482830  | 1.4586747  | -3.2001078 |
| O | 1.3482830  | -1.4586747 | -3.2001078 |
| C | -2.5843282 | -1.2288175 | -3.2143481 |
| H | -3.2117809 | -2.1282358 | -3.2177437 |
| C | -3.2369830 | 0.0000000  | -3.2250935 |
| H | -4.3182657 | 0.0000000  | -3.2319162 |
| C | -2.5843282 | 1.2288175  | -3.2143481 |
| H | -3.2117809 | 2.1282358  | -3.2177437 |
| O | -1.3482830 | -1.4586747 | -3.2001078 |
| O | -1.3482830 | 1.4586747  | -3.2001078 |
| C | 2.5798010  | 1.2294116  | 0.5018256  |
| H | 3.2083493  | 2.1278745  | 0.5311456  |
| C | 3.2297098  | 0.0000000  | 0.5589955  |
| H | 4.3091213  | 0.0000000  | 0.6244777  |
| C | 2.5798010  | -1.2294116 | 0.5018256  |
| H | 3.2083493  | -2.1278745 | 0.5311456  |
| O | 1.3478589  | 1.4604427  | 0.4169816  |

|    |            |            |            |
|----|------------|------------|------------|
| O  | 1.3478589  | -1.4604427 | 0.4169816  |
| C  | -2.5798010 | -1.2294116 | 0.5018256  |
| H  | -3.2083493 | -2.1278745 | 0.5311456  |
| C  | -3.2297098 | 0.0000000  | 0.5589955  |
| H  | -4.3091213 | 0.0000000  | 0.6244777  |
| C  | -2.5798010 | 1.2294116  | 0.5018256  |
| H  | -3.2083493 | 2.1278745  | 0.5311456  |
| O  | -1.3478589 | -1.4604427 | 0.4169816  |
| O  | -1.3478589 | 1.4604427  | 0.4169816  |
| C  | 0.6937346  | 1.2018198  | 3.8447163  |
| C  | -0.6937346 | 1.2018198  | 3.8447163  |
| C  | -1.3875066 | -0.0000000 | 3.8483592  |
| C  | -0.6937346 | -1.2018198 | 3.8447163  |
| C  | 0.6937346  | -1.2018198 | 3.8447163  |
| C  | 1.3875066  | 0.0000000  | 3.8483592  |
| H  | 1.2345305  | 2.1410779  | 3.8285684  |
| H  | -1.2345305 | 2.1410779  | 3.8285684  |
| H  | -1.2345305 | -2.1410779 | 3.8285684  |
| H  | 1.2345305  | -2.1410779 | 3.8285684  |
| H  | 2.4714194  | 0.0000000  | 3.8378834  |
| H  | -2.4714194 | 0.0000000  | 3.8378834  |
| Pd | -0.0000000 | 0.0000000  | 0.3997473  |
| Pd | 0.0000000  | 0.0000000  | -3.1893104 |

**27b.**

|   |            |            |            |
|---|------------|------------|------------|
| C | 2.5829323  | 1.2290764  | -3.2139727 |
| H | 3.2103683  | 2.1284757  | -3.2170313 |
| C | 3.2352970  | 0.0000000  | -3.2199670 |
| H | 4.3165570  | 0.0000000  | -3.2228004 |
| C | 2.5829323  | -1.2290764 | -3.2139727 |
| H | 3.2103683  | -2.1284757 | -3.2170313 |
| O | 1.3469737  | 1.4592965  | -3.2053632 |
| O | 1.3469737  | -1.4592965 | -3.2053632 |
| C | -2.5829323 | -1.2290764 | -3.2139727 |
| H | -3.2103683 | -2.1284757 | -3.2170313 |

|    |            |            |            |
|----|------------|------------|------------|
| C  | -3.2352970 | 0.0000000  | -3.2199670 |
| H  | -4.3165570 | 0.0000000  | -3.2228004 |
| C  | -2.5829323 | 1.2290764  | -3.2139727 |
| H  | -3.2103683 | 2.1284757  | -3.2170313 |
| O  | -1.3469737 | -1.4592965 | -3.2053632 |
| O  | -1.3469737 | 1.4592965  | -3.2053632 |
| C  | 2.5800701  | 1.2291627  | 0.5086318  |
| H  | 3.2086860  | 2.1275787  | 0.5397965  |
| C  | 3.2294236  | -0.0000000 | 0.5762118  |
| H  | 4.3081125  | -0.0000000 | 0.6534830  |
| C  | 2.5800701  | -1.2291627 | 0.5086318  |
| H  | 3.2086860  | -2.1275787 | 0.5397965  |
| O  | 1.3490014  | 1.4598970  | 0.4103335  |
| O  | 1.3490014  | -1.4598970 | 0.4103335  |
| C  | -2.5800701 | -1.2291627 | 0.5086318  |
| H  | -3.2086860 | -2.1275787 | 0.5397965  |
| C  | -3.2294236 | 0.0000000  | 0.5762118  |
| H  | -4.3081125 | 0.0000000  | 0.6534830  |
| C  | -2.5800701 | 1.2291627  | 0.5086318  |
| H  | -3.2086860 | 2.1275787  | 0.5397965  |
| O  | -1.3490014 | -1.4598970 | 0.4103335  |
| O  | -1.3490014 | 1.4598970  | 0.4103335  |
| C  | 1.2011176  | -0.6937704 | 3.8367594  |
| C  | 1.2011176  | 0.6937704  | 3.8367594  |
| C  | -0.0000000 | 1.3883020  | 3.8335088  |
| C  | -1.2011176 | 0.6937704  | 3.8367594  |
| C  | -1.2011176 | -0.6937704 | 3.8367594  |
| C  | -0.0000000 | -1.3883020 | 3.8335088  |
| H  | 2.1405036  | -1.2348231 | 3.8245378  |
| H  | 2.1405036  | 1.2348231  | 3.8245378  |
| H  | -0.0000000 | 2.4717488  | 3.8136131  |
| H  | -2.1405036 | 1.2348231  | 3.8245378  |
| H  | -2.1405036 | -1.2348231 | 3.8245378  |
| H  | -0.0000000 | -2.4717488 | 3.8136131  |
| Pd | 0.0000000  | 0.0000000  | 0.3919249  |

|             |            |            |            |
|-------------|------------|------------|------------|
| Pd          | 0.0000000  | 0.0000000  | -3.1947902 |
| <b>28a.</b> |            |            |            |
| C           | 2.5832254  | 1.2287727  | -3.2335859 |
| H           | 3.2103810  | 2.1282418  | -3.2470305 |
| C           | 3.2352179  | 0.0000000  | -3.2616746 |
| H           | 4.3161068  | 0.0000000  | -3.2911851 |
| C           | 2.5832254  | -1.2287727 | -3.2335859 |
| H           | 3.2103810  | -2.1282418 | -3.2470305 |
| O           | 1.3476502  | 1.4588016  | -3.1923211 |
| O           | 1.3476502  | -1.4588016 | -3.1923211 |
| C           | -2.5832254 | -1.2287727 | -3.2335859 |
| H           | -3.2103810 | -2.1282418 | -3.2470305 |
| C           | -3.2352179 | 0.0000000  | -3.2616746 |
| H           | -4.3161068 | 0.0000000  | -3.2911851 |
| C           | -2.5832254 | 1.2287727  | -3.2335859 |
| H           | -3.2103810 | 2.1282418  | -3.2470305 |
| O           | -1.3476502 | -1.4588016 | -3.1923211 |
| O           | -1.3476502 | 1.4588016  | -3.1923211 |
| C           | 2.5831476  | 1.2286376  | 0.4781666  |
| H           | 3.2117755  | 2.1270217  | 0.4925019  |
| C           | 3.2342727  | 0.0000000  | 0.4917488  |
| H           | 4.3150013  | 0.0000000  | 0.5205815  |
| C           | 2.5831476  | -1.2286376 | 0.4781666  |
| H           | 3.2117755  | -2.1270217 | 0.4925019  |
| O           | 1.3471901  | 1.4604961  | 0.4519746  |
| O           | 1.3471901  | -1.4604961 | 0.4519746  |
| C           | -2.5831476 | -1.2286376 | 0.4781666  |
| H           | -3.2117755 | -2.1270217 | 0.4925019  |
| C           | -3.2342727 | 0.0000000  | 0.4917488  |
| H           | -4.3150013 | 0.0000000  | 0.5205815  |
| C           | -2.5831476 | 1.2286376  | 0.4781666  |
| H           | -3.2117755 | 2.1270217  | 0.4925019  |
| O           | -1.3471901 | -1.4604961 | 0.4519746  |
| O           | -1.3471901 | 1.4604961  | 0.4519746  |
| C           | 0.6931008  | 1.2085177  | 3.9052300  |

|    |            |            |            |
|----|------------|------------|------------|
| C  | -0.6931008 | 1.2085177  | 3.9052300  |
| C  | -1.3613419 | 0.0000000  | 3.9115328  |
| C  | -0.6931008 | -1.2085177 | 3.9052300  |
| C  | 0.6931008  | -1.2085177 | 3.9052300  |
| C  | 1.3613419  | 0.0000000  | 3.9115328  |
| F  | 2.7024877  | 0.0000000  | 3.9139492  |
| F  | -2.7024877 | 0.0000000  | 3.9139492  |
| H  | 1.2549151  | 2.1333542  | 3.8875250  |
| H  | -1.2549151 | 2.1333542  | 3.8875250  |
| H  | -1.2549151 | -2.1333542 | 3.8875250  |
| H  | 1.2549151  | -2.1333542 | 3.8875250  |
| Pd | 0.0000000  | 0.0000000  | 0.4374400  |
| Pd | 0.0000000  | 0.0000000  | -3.1771874 |

**28b.**

|   |            |            |            |
|---|------------|------------|------------|
| C | 2.5832368  | 1.2290725  | -3.2069641 |
| H | 3.2104349  | 2.1286056  | -3.2078123 |
| C | 3.2357677  | 0.0000000  | -3.2057751 |
| H | 4.3171042  | 0.0000000  | -3.2014787 |
| C | 2.5832368  | -1.2290725 | -3.2069641 |
| H | 3.2104349  | -2.1286056 | -3.2078123 |
| O | 1.3471171  | 1.4590153  | -3.2076854 |
| O | 1.3471171  | -1.4590153 | -3.2076854 |
| C | -2.5832368 | -1.2290725 | -3.2069641 |
| H | -3.2104349 | -2.1286056 | -3.2078123 |
| C | -3.2357677 | 0.0000000  | -3.2057751 |
| H | -4.3171042 | 0.0000000  | -3.2014787 |
| C | -2.5832368 | 1.2290725  | -3.2069641 |
| H | -3.2104349 | 2.1286056  | -3.2078123 |
| O | -1.3471171 | -1.4590153 | -3.2076854 |
| O | -1.3471171 | 1.4590153  | -3.2076854 |
| C | 2.5796738  | 1.2292705  | 0.5135007  |
| H | 3.2066545  | 2.1285624  | 0.5463498  |
| C | 3.2287578  | 0.0000000  | 0.5864455  |
| H | 4.3071959  | 0.0000000  | 0.6666764  |

|    |            |            |            |
|----|------------|------------|------------|
| C  | 2.5796738  | -1.2292705 | 0.5135007  |
| H  | 3.2066545  | -2.1285624 | 0.5463498  |
| O  | 1.3486255  | 1.4587684  | 0.4096324  |
| O  | 1.3486255  | -1.4587684 | 0.4096324  |
| C  | -2.5796738 | -1.2292705 | 0.5135007  |
| H  | -3.2066545 | -2.1285624 | 0.5463498  |
| C  | -3.2287578 | 0.0000000  | 0.5864455  |
| H  | -4.3071959 | 0.0000000  | 0.6666764  |
| C  | -2.5796738 | 1.2292705  | 0.5135007  |
| H  | -3.2066545 | 2.1285624  | 0.5463498  |
| O  | -1.3486255 | -1.4587684 | 0.4096324  |
| O  | -1.3486255 | 1.4587684  | 0.4096324  |
| C  | 1.2077521  | -0.6931765 | 3.8165309  |
| C  | 1.2077521  | 0.6931765  | 3.8165309  |
| C  | -0.0000000 | 1.3634521  | 3.8156415  |
| C  | -1.2077521 | 0.6931765  | 3.8165309  |
| C  | -1.2077521 | -0.6931765 | 3.8165309  |
| C  | -0.0000000 | -1.3634521 | 3.8156415  |
| H  | 2.1328393  | -1.2550257 | 3.8043371  |
| H  | 2.1328393  | 1.2550257  | 3.8043371  |
| H  | -2.1328393 | 1.2550257  | 3.8043371  |
| H  | -2.1328393 | -1.2550257 | 3.8043371  |
| F  | -0.0000000 | 2.7017593  | 3.8085080  |
| F  | -0.0000000 | -2.7017593 | 3.8085080  |
| Pd | 0.0000000  | 0.0000000  | -3.1985978 |
| Pd | 0.0000000  | 0.0000000  | 0.3870067  |

**29a.**

|   |           |            |            |
|---|-----------|------------|------------|
| C | 2.5831159 | 1.2291174  | -3.1812620 |
| H | 3.2102455 | 2.1286656  | -3.1799544 |
| C | 3.2355729 | 0.0000000  | -3.1769798 |
| H | 4.3168421 | 0.0000000  | -3.1687280 |
| C | 2.5831159 | -1.2291174 | -3.1812620 |
| H | 3.2102455 | -2.1286656 | -3.1799544 |
| O | 1.3469772 | 1.4589832  | -3.1869476 |

|   |            |            |            |
|---|------------|------------|------------|
| O | 1.3469772  | -1.4589832 | -3.1869476 |
| C | -2.5831159 | -1.2291174 | -3.1812620 |
| H | -3.2102455 | -2.1286656 | -3.1799544 |
| C | -3.2355729 | 0.0000000  | -3.1769798 |
| H | -4.3168421 | 0.0000000  | -3.1687280 |
| C | -2.5831159 | 1.2291174  | -3.1812620 |
| H | -3.2102455 | 2.1286656  | -3.1799544 |
| O | -1.3469772 | -1.4589832 | -3.1869476 |
| O | -1.3469772 | 1.4589832  | -3.1869476 |
| C | 2.5781632  | 1.2298608  | 0.5318893  |
| H | 3.2031212  | 2.1295222  | 0.5760646  |
| C | 3.2255779  | 0.0000000  | 0.6141164  |
| H | 4.3027800  | 0.0000000  | 0.7100278  |
| C | 2.5781632  | -1.2298608 | 0.5318893  |
| H | 3.2031212  | -2.1295222 | 0.5760646  |
| O | 1.3481048  | 1.4583569  | 0.4104837  |
| O | 1.3481048  | -1.4583569 | 0.4104837  |
| C | -2.5781632 | -1.2298608 | 0.5318893  |
| H | -3.2031212 | -2.1295222 | 0.5760646  |
| C | -3.2255779 | 0.0000000  | 0.6141164  |
| H | -4.3027800 | 0.0000000  | 0.7100278  |
| C | -2.5781632 | 1.2298608  | 0.5318893  |
| H | -3.2031212 | 2.1295222  | 0.5760646  |
| O | -1.3481048 | -1.4583569 | 0.4104837  |
| O | -1.3481048 | 1.4583569  | 0.4104837  |
| C | 0.6927157  | 1.1912675  | 3.7519333  |
| C | -0.6927157 | 1.1912675  | 3.7519333  |
| C | -1.3905170 | 0.0000000  | 3.7561332  |
| C | -0.6927157 | -1.1912675 | 3.7519333  |
| C | 0.6927157  | -1.1912675 | 3.7519333  |
| C | 1.3905170  | 0.0000000  | 3.7561332  |
| F | -1.3534000 | 2.3453471  | 3.7410363  |
| F | 1.3534000  | 2.3453471  | 3.7410363  |
| F | -1.3534000 | -2.3453471 | 3.7410363  |
| F | 1.3534000  | -2.3453471 | 3.7410363  |



|    |            |           |            |
|----|------------|-----------|------------|
| H  | -2.4719913 | 0.0000000 | 3.7399787  |
| H  | 2.4719913  | 0.0000000 | 3.7399787  |
| Pd | 0.0000000  | 0.0000000 | 0.3773855  |
| Pd | 0.0000000  | 0.0000000 | -3.1794554 |

**29b.**

|   |            |            |            |
|---|------------|------------|------------|
| C | 2.5833183  | 1.2289330  | -3.1942001 |
| H | 3.2105691  | 2.1283846  | -3.1971572 |
| C | 3.2357303  | -0.0000000 | -3.2026082 |
| H | 4.3169847  | 0.0000000  | -3.2071991 |
| C | 2.5833183  | -1.2289330 | -3.1942001 |
| H | 3.2105691  | -2.1283846 | -3.1971572 |
| O | 1.3471412  | 1.4590446  | -3.1827438 |
| O | 1.3471412  | -1.4590446 | -3.1827438 |
| C | -2.5833183 | -1.2289330 | -3.1942001 |
| H | -3.2105691 | -2.1283846 | -3.1971572 |
| C | -3.2357303 | 0.0000000  | -3.2026082 |
| H | -4.3169847 | -0.0000000 | -3.2071991 |
| C | -2.5833183 | 1.2289330  | -3.1942001 |
| H | -3.2105691 | 2.1283846  | -3.1971572 |
| O | -1.3471412 | -1.4590446 | -3.1827438 |
| O | -1.3471412 | 1.4590446  | -3.1827438 |
| C | 2.5809863  | 1.2290068  | 0.5196568  |
| H | 3.2076735  | 2.1273498  | 0.5610803  |
| C | 3.2294738  | 0.0000000  | 0.5746127  |
| H | 4.3071252  | 0.0000000  | 0.6614730  |
| C | 2.5809863  | -1.2290068 | 0.5196568  |
| H | 3.2076735  | -2.1273498 | 0.5610803  |
| O | 1.3474540  | 1.4603174  | 0.4284729  |
| O | 1.3474540  | -1.4603174 | 0.4284729  |
| C | -2.5809863 | -1.2290068 | 0.5196568  |
| H | -3.2076735 | -2.1273498 | 0.5610803  |
| C | -3.2294738 | 0.0000000  | 0.5746127  |
| H | -4.3071252 | 0.0000000  | 0.6614730  |
| C | -2.5809863 | 1.2290068  | 0.5196568  |

|    |            |            |            |
|----|------------|------------|------------|
| H  | -3.2076735 | 2.1273498  | 0.5610803  |
| O  | -1.3474540 | -1.4603174 | 0.4284729  |
| O  | -1.3474540 | 1.4603174  | 0.4284729  |
| C  | 1.1897563  | -0.6927712 | 3.7905314  |
| C  | 1.1897563  | 0.6927712  | 3.7905314  |
| C  | -0.0000000 | 1.3922243  | 3.7861024  |
| C  | -1.1897563 | 0.6927712  | 3.7905314  |
| C  | -1.1897563 | -0.6927712 | 3.7905314  |
| C  | -0.0000000 | -1.3922243 | 3.7861024  |
| F  | 2.3464981  | 1.3512191  | 3.7826432  |
| F  | 2.3464981  | -1.3512191 | 3.7826432  |
| F  | -2.3464981 | 1.3512191  | 3.7826432  |
| F  | -2.3464981 | -1.3512191 | 3.7826432  |
| H  | 0.0000000  | 2.4734848  | 3.7596828  |
| H  | 0.0000000  | -2.4734848 | 3.7596828  |
| Pd | 0.0000000  | 0.0000000  | -3.1731125 |
| Pd | 0.0000000  | 0.0000000  | 0.3958510  |

**30a.**

|   |            |            |            |
|---|------------|------------|------------|
| C | 2.5833558  | 1.2287651  | -3.2187407 |
| H | 3.2100073  | 2.1284750  | -3.2350747 |
| C | 3.2353044  | 0.0000000  | -3.2507758 |
| H | 4.3159446  | 0.0000000  | -3.2883192 |
| C | 2.5833558  | -1.2287651 | -3.2187407 |
| H | 3.2100073  | -2.1284750 | -3.2350747 |
| O | 1.3478847  | 1.4584517  | -3.1704362 |
| O | 1.3478847  | -1.4584517 | -3.1704362 |
| C | -2.5833558 | -1.2287651 | -3.2187407 |
| H | -3.2100073 | -2.1284750 | -3.2350747 |
| C | -3.2353044 | 0.0000000  | -3.2507758 |
| H | -4.3159446 | 0.0000000  | -3.2883192 |
| C | -2.5833558 | 1.2287651  | -3.2187407 |
| H | -3.2100073 | 2.1284750  | -3.2350747 |
| O | -1.3478847 | -1.4584517 | -3.1704362 |
| O | -1.3478847 | 1.4584517  | -3.1704362 |

|    |            |            |            |
|----|------------|------------|------------|
| C  | 2.5825751  | 1.2291198  | 0.5051060  |
| H  | 3.2084823  | 2.1285768  | 0.5291493  |
| C  | 3.2331998  | 0.0000000  | 0.5253415  |
| H  | 4.3135272  | -0.0000000 | 0.5658471  |
| C  | 2.5825751  | -1.2291198 | 0.5051060  |
| H  | 3.2084823  | -2.1285768 | 0.5291493  |
| O  | 1.3459011  | 1.4592773  | 0.4663706  |
| O  | 1.3459011  | -1.4592773 | 0.4663706  |
| C  | -2.5825751 | -1.2291198 | 0.5051060  |
| H  | -3.2084823 | -2.1285768 | 0.5291493  |
| C  | -3.2331998 | 0.0000000  | 0.5253415  |
| H  | -4.3135272 | -0.0000000 | 0.5658471  |
| C  | -2.5825751 | 1.2291198  | 0.5051060  |
| H  | -3.2084823 | 2.1285768  | 0.5291493  |
| O  | -1.3459011 | -1.4592773 | 0.4663706  |
| O  | -1.3459011 | 1.4592773  | 0.4663706  |
| C  | 0.6927118  | 1.2010428  | 3.8406209  |
| C  | -0.6927118 | 1.2010428  | 3.8406209  |
| C  | -1.3834458 | 0.0000000  | 3.8491349  |
| C  | -0.6927118 | -1.2010428 | 3.8406209  |
| C  | 0.6927118  | -1.2010428 | 3.8406209  |
| C  | 1.3834458  | -0.0000000 | 3.8491349  |
| F  | -1.3584064 | 2.3433478  | 3.8314937  |
| F  | 1.3584064  | 2.3433478  | 3.8314937  |
| F  | -1.3584064 | -2.3433478 | 3.8314937  |
| F  | 1.3584064  | -2.3433478 | 3.8314937  |
| F  | 2.7070225  | -0.0000000 | 3.8592913  |
| F  | -2.7070225 | 0.0000000  | 3.8592913  |
| Pd | 0.0000000  | 0.0000000  | -3.1552529 |
| Pd | 0.0000000  | 0.0000000  | 0.4402582  |

**30b.**

|   |           |           |            |
|---|-----------|-----------|------------|
| C | 2.5835088 | 1.2289386 | -3.2056291 |
| H | 3.2105876 | 2.1284527 | -3.2139525 |
| C | 3.2358981 | 0.0000000 | -3.2206271 |

|   |            |            |            |
|---|------------|------------|------------|
| H | 4.3170809  | -0.0000000 | -3.2374744 |
| C | 2.5835088  | -1.2289386 | -3.2056291 |
| H | 3.2105876  | -2.1284527 | -3.2139525 |
| O | 1.3473842  | 1.4587221  | -3.1825209 |
| O | 1.3473842  | -1.4587221 | -3.1825209 |
| C | -2.5835088 | -1.2289386 | -3.2056291 |
| H | -3.2105876 | -2.1284527 | -3.2139525 |
| C | -3.2358981 | 0.0000000  | -3.2206271 |
| H | -4.3170809 | 0.0000000  | -3.2374744 |
| C | -2.5835088 | 1.2289386  | -3.2056291 |
| H | -3.2105876 | 2.1284527  | -3.2139525 |
| O | -1.3473842 | -1.4587221 | -3.1825209 |
| O | -1.3473842 | 1.4587221  | -3.1825209 |
| C | 2.5813080  | 1.2291275  | 0.5317526  |
| H | 3.2064611  | 2.1284469  | 0.5704016  |
| C | 3.2304749  | -0.0000000 | 0.5817878  |
| H | 4.3088249  | 0.0000000  | 0.6589686  |
| C | 2.5813080  | -1.2291275 | 0.5317526  |
| H | 3.2064611  | -2.1284469 | 0.5704016  |
| O | 1.3467878  | 1.4592890  | 0.4501956  |
| O | 1.3467878  | -1.4592890 | 0.4501956  |
| C | -2.5813080 | -1.2291275 | 0.5317526  |
| H | -3.2064611 | -2.1284469 | 0.5704016  |
| C | -3.2304749 | 0.0000000  | 0.5817878  |
| H | -4.3088249 | -0.0000000 | 0.6589686  |
| C | -2.5813080 | 1.2291275  | 0.5317526  |
| H | -3.2064611 | 2.1284469  | 0.5704016  |
| O | -1.3467878 | -1.4592890 | 0.4501956  |
| O | -1.3467878 | 1.4592890  | 0.4501956  |
| C | 1.1992601  | -0.6928591 | 3.7864356  |
| C | 1.1992601  | 0.6928591  | 3.7864356  |
| C | 0.0000000  | 1.3864926  | 3.7830735  |
| C | -1.1992601 | 0.6928591  | 3.7864356  |
| C | -1.1992601 | -0.6928591 | 3.7864356  |
| C | 0.0000000  | -1.3864926 | 3.7830735  |

|    |            |            |            |
|----|------------|------------|------------|
| F  | -0.0000000 | 2.7073984  | 3.7741638  |
| F  | 0.0000000  | -2.7073984 | 3.7741638  |
| F  | 2.3438976  | 1.3573401  | 3.7821538  |
| F  | 2.3438976  | -1.3573401 | 3.7821538  |
| F  | -2.3438976 | 1.3573401  | 3.7821538  |
| F  | -2.3438976 | -1.3573401 | 3.7821538  |
| Pd | -0.0000000 | 0.0000000  | 0.4157268  |
| Pd | 0.0000000  | 0.0000000  | -3.1708586 |

**31a.**

|   |            |            |            |
|---|------------|------------|------------|
| C | 2.5784049  | 1.2322855  | -3.2027854 |
| H | 3.2035122  | 2.1310001  | -3.2030082 |
| C | 3.2229953  | 0.0000000  | -3.2061895 |
| H | 4.3045350  | 0.0000000  | -3.2044907 |
| C | 2.5784049  | -1.2322855 | -3.2027854 |
| H | 3.2035122  | -2.1310001 | -3.2030082 |
| O | 1.3391162  | 1.4678199  | -3.1990739 |
| O | 1.3391162  | -1.4678199 | -3.1990739 |
| C | -2.5784049 | -1.2322855 | -3.2027854 |
| H | -3.2035122 | -2.1310001 | -3.2030082 |
| C | -3.2229953 | 0.0000000  | -3.2061895 |
| H | -4.3045350 | 0.0000000  | -3.2044907 |
| C | -2.5784049 | 1.2322855  | -3.2027854 |
| H | -3.2035122 | 2.1310001  | -3.2030082 |
| O | -1.3391162 | -1.4678199 | -3.1990739 |
| O | -1.3391162 | 1.4678199  | -3.1990739 |
| C | 2.5756999  | 1.2325000  | 0.5020722  |
| H | 3.2019128  | 2.1303489  | 0.5264657  |
| C | 3.2185553  | -0.0000000 | 0.5495385  |
| H | 4.2986964  | 0.0000000  | 0.6055681  |
| C | 2.5756999  | -1.2325000 | 0.5020722  |
| H | 3.2019128  | -2.1303489 | 0.5264657  |
| O | 1.3393795  | 1.4684881  | 0.4306794  |
| O | 1.3393795  | -1.4684881 | 0.4306794  |
| C | -2.5756999 | -1.2325000 | 0.5020722  |

|    |            |            |            |
|----|------------|------------|------------|
| H  | -3.2019128 | -2.1303489 | 0.5264657  |
| C  | -3.2185553 | 0.0000000  | 0.5495385  |
| H  | -4.2986964 | 0.0000000  | 0.6055681  |
| C  | -2.5756999 | 1.2325000  | 0.5020722  |
| H  | -3.2019128 | 2.1303489  | 0.5264657  |
| O  | -1.3393795 | -1.4684881 | 0.4306794  |
| O  | -1.3393795 | 1.4684881  | 0.4306794  |
| C  | 0.6935744  | 1.2015674  | 3.8290820  |
| C  | -0.6935744 | 1.2015674  | 3.8290820  |
| C  | -1.3871592 | 0.0000000  | 3.8324677  |
| C  | -0.6935744 | -1.2015674 | 3.8290820  |
| C  | 0.6935744  | -1.2015674 | 3.8290820  |
| C  | 1.3871592  | -0.0000000 | 3.8324677  |
| H  | 1.2343664  | 2.1408422  | 3.8122297  |
| H  | -1.2343664 | 2.1408422  | 3.8122297  |
| H  | -1.2343664 | -2.1408422 | 3.8122297  |
| H  | 1.2343664  | -2.1408422 | 3.8122297  |
| Pt | 0.0000000  | 0.0000000  | 0.4139479  |
| Pt | 0.0000000  | 0.0000000  | -3.1921356 |
| H  | 2.4710823  | 0.0000000  | 3.8208769  |
| H  | -2.4710823 | 0.0000000  | 3.8208769  |

**31b.**

|   |            |            |            |
|---|------------|------------|------------|
| C | 2.5772220  | 1.2322132  | -3.2225272 |
| H | 3.2002745  | 2.1320444  | -3.2487695 |
| C | 3.2213431  | 0.0000000  | -3.2749293 |
| H | 4.3016682  | -0.0000000 | -3.3396900 |
| C | 2.5772220  | -1.2322132 | -3.2225272 |
| H | 3.2002745  | -2.1320444 | -3.2487695 |
| O | 1.3401430  | 1.4665533  | -3.1398580 |
| O | 1.3401430  | -1.4665533 | -3.1398580 |
| C | -2.5772220 | -1.2322132 | -3.2225272 |
| H | -3.2002745 | -2.1320444 | -3.2487695 |
| C | -3.2213431 | 0.0000000  | -3.2749293 |
| H | -4.3016682 | 0.0000000  | -3.3396900 |

|    |            |            |            |
|----|------------|------------|------------|
| C  | -2.5772220 | 1.2322132  | -3.2225272 |
| H  | -3.2002745 | 2.1320444  | -3.2487695 |
| O  | -1.3401430 | -1.4665533 | -3.1398580 |
| O  | -1.3401430 | 1.4665533  | -3.1398580 |
| C  | 2.5755477  | 1.2331795  | 0.5008454  |
| H  | 3.2035583  | 2.1304491  | 0.5066124  |
| C  | 3.2190587  | 0.0000000  | 0.5200403  |
| H  | 4.2998585  | 0.0000000  | 0.5359530  |
| C  | 2.5755477  | -1.2331795 | 0.5008454  |
| H  | 3.2035583  | -2.1304491 | 0.5066124  |
| O  | 1.3378484  | 1.4703204  | 0.4743814  |
| O  | 1.3378484  | -1.4703204 | 0.4743814  |
| C  | -2.5755477 | -1.2331795 | 0.5008454  |
| H  | -3.2035583 | -2.1304491 | 0.5066124  |
| C  | -3.2190587 | 0.0000000  | 0.5200403  |
| H  | -4.2998585 | 0.0000000  | 0.5359530  |
| C  | -2.5755477 | 1.2331795  | 0.5008454  |
| H  | -3.2035583 | 2.1304491  | 0.5066124  |
| O  | -1.3378484 | -1.4703204 | 0.4743814  |
| O  | -1.3378484 | 1.4703204  | 0.4743814  |
| C  | 1.2006345  | -0.6937610 | 3.8650253  |
| C  | 1.2006345  | 0.6937610  | 3.8650253  |
| C  | 0.0000000  | 1.3890918  | 3.8676799  |
| C  | -1.2006345 | 0.6937610  | 3.8650253  |
| C  | -1.2006345 | -0.6937610 | 3.8650253  |
| C  | 0.0000000  | -1.3890918 | 3.8676799  |
| H  | 2.1417430  | -1.2320782 | 3.8512445  |
| H  | 2.1417430  | 1.2320782  | 3.8512445  |
| H  | 0.0000000  | 2.4728816  | 3.8449091  |
| H  | -2.1417430 | 1.2320782  | 3.8512445  |
| H  | -2.1417430 | -1.2320782 | 3.8512445  |
| H  | 0.0000000  | -2.4728816 | 3.8449091  |
| Pt | 0.0000000  | 0.0000000  | -3.1223050 |
| Pt | -0.0000000 | 0.0000000  | 0.4665622  |

**32a.**

|   |            |            |            |
|---|------------|------------|------------|
| C | 2.5791632  | 1.2320386  | -3.2157937 |
| H | 3.2040071  | 2.1308698  | -3.2223672 |
| C | 3.2237301  | 0.0000000  | -3.2308507 |
| H | 4.3051604  | 0.0000000  | -3.2440113 |
| C | 2.5791632  | -1.2320386 | -3.2157937 |
| H | 3.2040071  | -2.1308698 | -3.2223672 |
| O | 1.3398436  | 1.4674208  | -3.1940883 |
| O | 1.3398436  | -1.4674208 | -3.1940883 |
| C | -2.5791632 | -1.2320386 | -3.2157937 |
| H | -3.2040071 | -2.1308698 | -3.2223672 |
| C | -3.2237301 | -0.0000000 | -3.2308507 |
| H | -4.3051604 | 0.0000000  | -3.2440113 |
| C | -2.5791632 | 1.2320386  | -3.2157937 |
| H | -3.2040071 | 2.1308698  | -3.2223672 |
| O | -1.3398436 | -1.4674208 | -3.1940883 |
| O | -1.3398436 | 1.4674208  | -3.1940883 |
| C | 2.5775153  | 1.2318617  | 0.4800749  |
| H | 3.2036365  | 2.1295921  | 0.4966851  |
| C | 3.2205366  | 0.0000000  | 0.4988618  |
| H | 4.3011922  | 0.0000000  | 0.5358205  |
| C | 2.5775153  | -1.2318617 | 0.4800749  |
| H | 3.2036365  | -2.1295921 | 0.4966851  |
| O | 1.3383810  | 1.4690984  | 0.4460094  |
| O | 1.3383810  | -1.4690984 | 0.4460094  |
| C | -2.5775153 | -1.2318617 | 0.4800749  |
| H | -3.2036365 | -2.1295921 | 0.4966851  |
| C | -3.2205366 | 0.0000000  | 0.4988618  |
| H | -4.3011922 | -0.0000000 | 0.5358205  |
| C | -2.5775153 | 1.2318617  | 0.4800749  |
| H | -3.2036365 | 2.1295921  | 0.4966851  |
| O | -1.3383810 | -1.4690984 | 0.4460094  |
| O | -1.3383810 | 1.4690984  | 0.4460094  |
| C | 0.6929358  | 1.2083134  | 3.8757411  |
| C | -0.6929358 | 1.2083134  | 3.8757411  |



|    |            |            |            |
|----|------------|------------|------------|
| C  | -1.3607845 | 0.0000000  | 3.8829138  |
| C  | -0.6929358 | -1.2083134 | 3.8757411  |
| C  | 0.6929358  | -1.2083134 | 3.8757411  |
| C  | 1.3607845  | 0.0000000  | 3.8829138  |
| F  | 2.7024901  | 0.0000000  | 3.8872494  |
| F  | -2.7024901 | 0.0000000  | 3.8872494  |
| H  | 1.2548331  | 2.1330858  | 3.8566970  |
| H  | -1.2548331 | 2.1330858  | 3.8566970  |
| H  | -1.2548331 | -2.1330858 | 3.8566970  |
| H  | 1.2548331  | -2.1330858 | 3.8566970  |
| Pt | 0.0000000  | 0.0000000  | 0.4323626  |
| Pt | 0.0000000  | 0.0000000  | -3.1841627 |

**32b.**

|   |            |            |            |
|---|------------|------------|------------|
| C | 2.5788073  | 1.2322952  | -3.2051175 |
| H | 3.2035860  | 2.1311776  | -3.2101286 |
| C | 3.2235324  | -0.0000000 | -3.2116430 |
| H | 4.3050691  | 0.0000000  | -3.2197122 |
| C | 2.5788073  | -1.2322952 | -3.2051175 |
| H | 3.2035860  | -2.1311776 | -3.2101286 |
| O | 1.3394662  | 1.4675531  | -3.1939178 |
| O | 1.3394662  | -1.4675531 | -3.1939178 |
| C | -2.5788073 | -1.2322952 | -3.2051175 |
| H | -3.2035860 | -2.1311776 | -3.2101286 |
| C | -3.2235324 | -0.0000000 | -3.2116430 |
| H | -4.3050691 | 0.0000000  | -3.2197122 |
| C | -2.5788073 | 1.2322952  | -3.2051175 |
| H | -3.2035860 | 2.1311776  | -3.2101286 |
| O | -1.3394662 | -1.4675531 | -3.1939178 |
| O | -1.3394662 | 1.4675531  | -3.1939178 |
| C | 2.5750633  | 1.2326954  | 0.5151429  |
| H | 3.1998570  | 2.1313042  | 0.5418965  |
| C | 3.2174770  | 0.0000000  | 0.5713961  |
| H | 4.2972737  | 0.0000000  | 0.6329626  |
| C | 2.5750633  | -1.2326954 | 0.5151429  |

|    |            |            |            |
|----|------------|------------|------------|
| H  | 3.1998570  | -2.1313042 | 0.5418965  |
| O  | 1.3390129  | 1.4677560  | 0.4336959  |
| O  | 1.3390129  | -1.4677560 | 0.4336959  |
| C  | -2.5750633 | -1.2326954 | 0.5151429  |
| H  | -3.1998570 | -2.1313042 | 0.5418965  |
| C  | -3.2174770 | 0.0000000  | 0.5713961  |
| H  | -4.2972737 | -0.0000000 | 0.6329626  |
| C  | -2.5750633 | 1.2326954  | 0.5151429  |
| H  | -3.1998570 | 2.1313042  | 0.5418965  |
| O  | -1.3390129 | -1.4677560 | 0.4336959  |
| O  | -1.3390129 | 1.4677560  | 0.4336959  |
| C  | 1.2075154  | -0.6930310 | 3.8145719  |
| C  | 1.2075154  | 0.6930310  | 3.8145719  |
| C  | -0.0000000 | 1.3630134  | 3.8129928  |
| C  | -1.2075154 | 0.6930310  | 3.8145719  |
| C  | -1.2075154 | -0.6930310 | 3.8145719  |
| C  | -0.0000000 | -1.3630134 | 3.8129928  |
| H  | 2.1325026  | -1.2550874 | 3.8018785  |
| H  | 2.1325026  | 1.2550874  | 3.8018785  |
| H  | -2.1325026 | 1.2550874  | 3.8018785  |
| H  | -2.1325026 | -1.2550874 | 3.8018785  |
| Pt | 0.0000000  | 0.0000000  | -3.1852464 |
| Pt | -0.0000000 | 0.0000000  | 0.4141856  |
| F  | -0.0000000 | 2.7017540  | 3.8034903  |
| F  | -0.0000000 | -2.7017540 | 3.8034903  |

**33a.**

|   |           |            |            |
|---|-----------|------------|------------|
| C | 2.5782531 | 1.2323856  | -3.1737415 |
| H | 3.2030512 | 2.1312433  | -3.1745522 |
| C | 3.2227979 | 0.0000000  | -3.1744840 |
| H | 4.3043123 | 0.0000000  | -3.1726908 |
| C | 2.5782531 | -1.2323856 | -3.1737415 |
| H | 3.2030512 | -2.1312433 | -3.1745522 |
| O | 1.3388479 | 1.4677213  | -3.1719391 |
| O | 1.3388479 | -1.4677213 | -3.1719391 |

|   |            |            |            |
|---|------------|------------|------------|
| C | -2.5782531 | -1.2323856 | -3.1737415 |
| H | -3.2030512 | -2.1312433 | -3.1745522 |
| C | -3.2227979 | 0.0000000  | -3.1744840 |
| H | -4.3043123 | 0.0000000  | -3.1726908 |
| C | -2.5782531 | 1.2323856  | -3.1737415 |
| H | -3.2030512 | 2.1312433  | -3.1745522 |
| O | -1.3388479 | -1.4677213 | -3.1719391 |
| O | -1.3388479 | 1.4677213  | -3.1719391 |
| C | 2.5746492  | 1.2332555  | 0.5220714  |
| H | 3.1980534  | 2.1320629  | 0.5571172  |
| C | 3.2158882  | 0.0000000  | 0.5847898  |
| H | 4.2950492  | -0.0000000 | 0.6581546  |
| C | 2.5746492  | -1.2332555 | 0.5220714  |
| H | 3.1980534  | -2.1320629 | 0.5571172  |
| O | 1.3389412  | 1.4675699  | 0.4282469  |
| O | 1.3389412  | -1.4675699 | 0.4282469  |
| C | -2.5746492 | -1.2332555 | 0.5220714  |
| H | -3.1980534 | -2.1320629 | 0.5571172  |
| C | -3.2158882 | -0.0000000 | 0.5847898  |
| H | -4.2950492 | 0.0000000  | 0.6581546  |
| C | -2.5746492 | 1.2332555  | 0.5220714  |
| H | -3.1980534 | 2.1320629  | 0.5571172  |
| O | -1.3389412 | -1.4675699 | 0.4282469  |
| O | -1.3389412 | 1.4675699  | 0.4282469  |
| C | 0.6924797  | 1.1908338  | 3.7576648  |
| C | -0.6924797 | 1.1908338  | 3.7576648  |
| C | -1.3902516 | 0.0000000  | 3.7623951  |
| C | -0.6924797 | -1.1908338 | 3.7576648  |
| C | 0.6924797  | -1.1908338 | 3.7576648  |
| C | 1.3902516  | 0.0000000  | 3.7623951  |
| F | -1.3531860 | 2.3454783  | 3.7441673  |
| F | 1.3531860  | 2.3454783  | 3.7441673  |
| F | -1.3531860 | -2.3454783 | 3.7441673  |
| F | 1.3531860  | -2.3454783 | 3.7441673  |
| H | -2.4717183 | 0.0000000  | 3.7451173  |

|    |           |           |            |
|----|-----------|-----------|------------|
| H  | 2.4717183 | 0.0000000 | 3.7451173  |
| Pt | 0.0000000 | 0.0000000 | 0.4025047  |
| Pt | 0.0000000 | 0.0000000 | -3.1652079 |

**33b.**

|   |            |            |            |
|---|------------|------------|------------|
| C | 2.5785185  | 1.2322051  | -3.1797869 |
| H | 3.2034182  | 2.1309720  | -3.1811535 |
| C | 3.2230520  | 0.0000000  | -3.1845008 |
| H | 4.3045507  | 0.0000000  | -3.1855030 |
| C | 2.5785185  | -1.2322051 | -3.1797869 |
| H | 3.2034182  | -2.1309720 | -3.1811535 |
| O | 1.3390783  | 1.4677258  | -3.1733824 |
| O | 1.3390783  | -1.4677258 | -3.1733824 |
| C | -2.5785185 | -1.2322051 | -3.1797869 |
| H | -3.2034182 | -2.1309720 | -3.1811535 |
| C | -3.2230520 | 0.0000000  | -3.1845008 |
| H | -4.3045507 | 0.0000000  | -3.1855030 |
| C | -2.5785185 | 1.2322051  | -3.1797869 |
| H | -3.2034182 | 2.1309720  | -3.1811535 |
| O | -1.3390783 | -1.4677258 | -3.1733824 |
| O | -1.3390783 | 1.4677258  | -3.1733824 |
| C | 2.5762722  | 1.2323353  | 0.5121585  |
| H | 3.2010647  | 2.1299096  | 0.5483631  |
| C | 3.2172756  | 0.0000000  | 0.5584654  |
| H | 4.2959214  | -0.0000000 | 0.6335794  |
| C | 2.5762722  | -1.2323353 | 0.5121585  |
| H | 3.2010647  | -2.1299096 | 0.5483631  |
| O | 1.3386862  | 1.4692471  | 0.4339915  |
| O | 1.3386862  | -1.4692471 | 0.4339915  |
| C | -2.5762722 | -1.2323353 | 0.5121585  |
| H | -3.2010647 | -2.1299096 | 0.5483631  |
| C | -3.2172756 | 0.0000000  | 0.5584654  |
| H | -4.2959214 | 0.0000000  | 0.6335794  |
| C | -2.5762722 | 1.2323353  | 0.5121585  |
| H | -3.2010647 | 2.1299096  | 0.5483631  |

|    |            |            |            |
|----|------------|------------|------------|
| O  | -1.3386862 | -1.4692471 | 0.4339915  |
| O  | -1.3386862 | 1.4692471  | 0.4339915  |
| C  | 1.1892435  | -0.6925304 | 3.7820625  |
| C  | 1.1892435  | 0.6925304  | 3.7820625  |
| C  | 0.0000000  | 1.3920343  | 3.7789043  |
| C  | -1.1892435 | 0.6925304  | 3.7820625  |
| C  | -1.1892435 | -0.6925304 | 3.7820625  |
| C  | 0.0000000  | -1.3920343 | 3.7789043  |
| F  | 2.3466168  | 1.3510104  | 3.7716535  |
| F  | 2.3466168  | -1.3510104 | 3.7716535  |
| F  | -2.3466168 | 1.3510104  | 3.7716535  |
| F  | -2.3466168 | -1.3510104 | 3.7716535  |
| Pt | 0.0000000  | 0.0000000  | 0.4080108  |
| Pt | 0.0000000  | 0.0000000  | -3.1662270 |
| H  | 0.0000000  | 2.4732141  | 3.7503501  |
| H  | 0.0000000  | -2.4732141 | 3.7503501  |

**34a.**

|   |            |            |            |
|---|------------|------------|------------|
| C | 2.5788406  | 1.2320716  | -3.1932747 |
| H | 3.2032395  | 2.1311054  | -3.2042888 |
| C | 3.2231524  | -0.0000000 | -3.2164311 |
| H | 4.3042955  | 0.0000000  | -3.2427343 |
| C | 2.5788406  | -1.2320716 | -3.1932747 |
| H | 3.2032395  | -2.1311054 | -3.2042888 |
| O | 1.3396928  | 1.4672263  | -3.1584926 |
| O | 1.3396928  | -1.4672263 | -3.1584926 |
| C | -2.5788406 | -1.2320716 | -3.1932747 |
| H | -3.2032395 | -2.1311054 | -3.2042888 |
| C | -3.2231524 | 0.0000000  | -3.2164311 |
| H | -4.3042955 | 0.0000000  | -3.2427343 |
| C | -2.5788406 | 1.2320716  | -3.1932747 |
| H | -3.2032395 | 2.1311054  | -3.2042888 |
| O | -1.3396928 | -1.4672263 | -3.1584926 |
| O | -1.3396928 | 1.4672263  | -3.1584926 |
| C | 2.5777155  | 1.2324733  | 0.4931069  |

|    |            |            |            |
|----|------------|------------|------------|
| H  | 3.2018430  | 2.1309641  | 0.5124390  |
| C  | 3.2202326  | 0.0000000  | 0.5099463  |
| H  | 4.3010134  | 0.0000000  | 0.5433301  |
| C  | 2.5777155  | -1.2324733 | 0.4931069  |
| H  | 3.2018430  | -2.1309641 | 0.5124390  |
| O  | 1.3376996  | 1.4685037  | 0.4612104  |
| O  | 1.3376996  | -1.4685037 | 0.4612104  |
| C  | -2.5777155 | -1.2324733 | 0.4931069  |
| H  | -3.2018430 | -2.1309641 | 0.5124390  |
| C  | -3.2202326 | 0.0000000  | 0.5099463  |
| H  | -4.3010134 | 0.0000000  | 0.5433301  |
| C  | -2.5777155 | 1.2324733  | 0.4931069  |
| H  | -3.2018430 | 2.1309641  | 0.5124390  |
| O  | -1.3376996 | -1.4685037 | 0.4612104  |
| O  | -1.3376996 | 1.4685037  | 0.4612104  |
| C  | 0.6924408  | 1.2006255  | 3.8234173  |
| C  | -0.6924408 | 1.2006255  | 3.8234173  |
| C  | -1.3828590 | 0.0000000  | 3.8319704  |
| C  | -0.6924408 | -1.2006255 | 3.8234173  |
| C  | 0.6924408  | -1.2006255 | 3.8234173  |
| C  | 1.3828590  | 0.0000000  | 3.8319704  |
| F  | -1.3583324 | 2.3433994  | 3.8097618  |
| F  | 1.3583324  | 2.3433994  | 3.8097618  |
| F  | -1.3583324 | -2.3433994 | 3.8097618  |
| F  | 1.3583324  | -2.3433994 | 3.8097618  |
| Pt | 0.0000000  | 0.0000000  | 0.4434125  |
| Pt | 0.0000000  | 0.0000000  | -3.1468970 |
| F  | 2.7070139  | 0.0000000  | 3.8379026  |
| F  | -2.7070139 | 0.0000000  | 3.8379026  |

**34b.**

|   |           |           |            |
|---|-----------|-----------|------------|
| C | 2.5785382 | 1.2322476 | -3.1749245 |
| H | 3.2033197 | 2.1310665 | -3.1775089 |
| C | 3.2229852 | 0.0000000 | -3.1809376 |
| H | 4.3044438 | 0.0000000 | -3.1847190 |

|   |            |            |            |
|---|------------|------------|------------|
| C | 2.5785382  | -1.2322476 | -3.1749245 |
| H | 3.2033197  | -2.1310665 | -3.1775089 |
| O | 1.3390493  | 1.4676487  | -3.1659242 |
| O | 1.3390493  | -1.4676487 | -3.1659242 |
| C | -2.5785382 | -1.2322476 | -3.1749245 |
| H | -3.2033197 | -2.1310665 | -3.1775089 |
| C | -3.2229852 | 0.0000000  | -3.1809376 |
| H | -4.3044438 | 0.0000000  | -3.1847190 |
| C | -2.5785382 | 1.2322476  | -3.1749245 |
| H | -3.2033197 | 2.1310665  | -3.1775089 |
| O | -1.3390493 | -1.4676487 | -3.1659242 |
| O | -1.3390493 | 1.4676487  | -3.1659242 |
| C | 2.5767439  | 1.2325100  | 0.5132150  |
| H | 3.2002593  | 2.1309448  | 0.5465258  |
| C | 3.2181989  | -0.0000000 | 0.5567943  |
| H | 4.2974467  | 0.0000000  | 0.6239682  |
| C | 2.5767439  | -1.2325100 | 0.5132150  |
| H | 3.2002593  | -2.1309448 | 0.5465258  |
| O | 1.3383921  | 1.4684620  | 0.4419740  |
| O | 1.3383921  | -1.4684620 | 0.4419740  |
| C | -2.5767439 | -1.2325100 | 0.5132150  |
| H | -3.2002593 | -2.1309448 | 0.5465258  |
| C | -3.2181989 | -0.0000000 | 0.5567943  |
| H | -4.2974467 | 0.0000000  | 0.6239682  |
| C | -2.5767439 | 1.2325100  | 0.5132150  |
| H | -3.2002593 | 2.1309448  | 0.5465258  |
| O | -1.3383921 | -1.4684620 | 0.4419740  |
| O | -1.3383921 | 1.4684620  | 0.4419740  |
| C | 1.1987001  | -0.6925471 | 3.7713898  |
| C | 1.1987001  | 0.6925471  | 3.7713898  |
| C | 0.0000000  | 1.3861262  | 3.7670878  |
| C | -1.1987001 | 0.6925471  | 3.7713898  |
| C | -1.1987001 | -0.6925471 | 3.7713898  |
| C | 0.0000000  | -1.3861262 | 3.7670878  |
| F | -0.0000000 | 2.7074248  | 3.7516005  |

|    |            |            |            |
|----|------------|------------|------------|
| F  | -0.0000000 | -2.7074248 | 3.7516005  |
| F  | 2.3444582  | 1.3563126  | 3.7638233  |
| F  | 2.3444582  | -1.3563126 | 3.7638233  |
| F  | -2.3444582 | 1.3563126  | 3.7638233  |
| F  | -2.3444582 | -1.3563126 | 3.7638233  |
| Pt | -0.0000000 | 0.0000000  | 0.4163594  |
| Pt | 0.0000000  | 0.0000000  | -3.1582295 |



**Figure S1 (QTAIM and NCIplot for nickel complexes 11-14)**

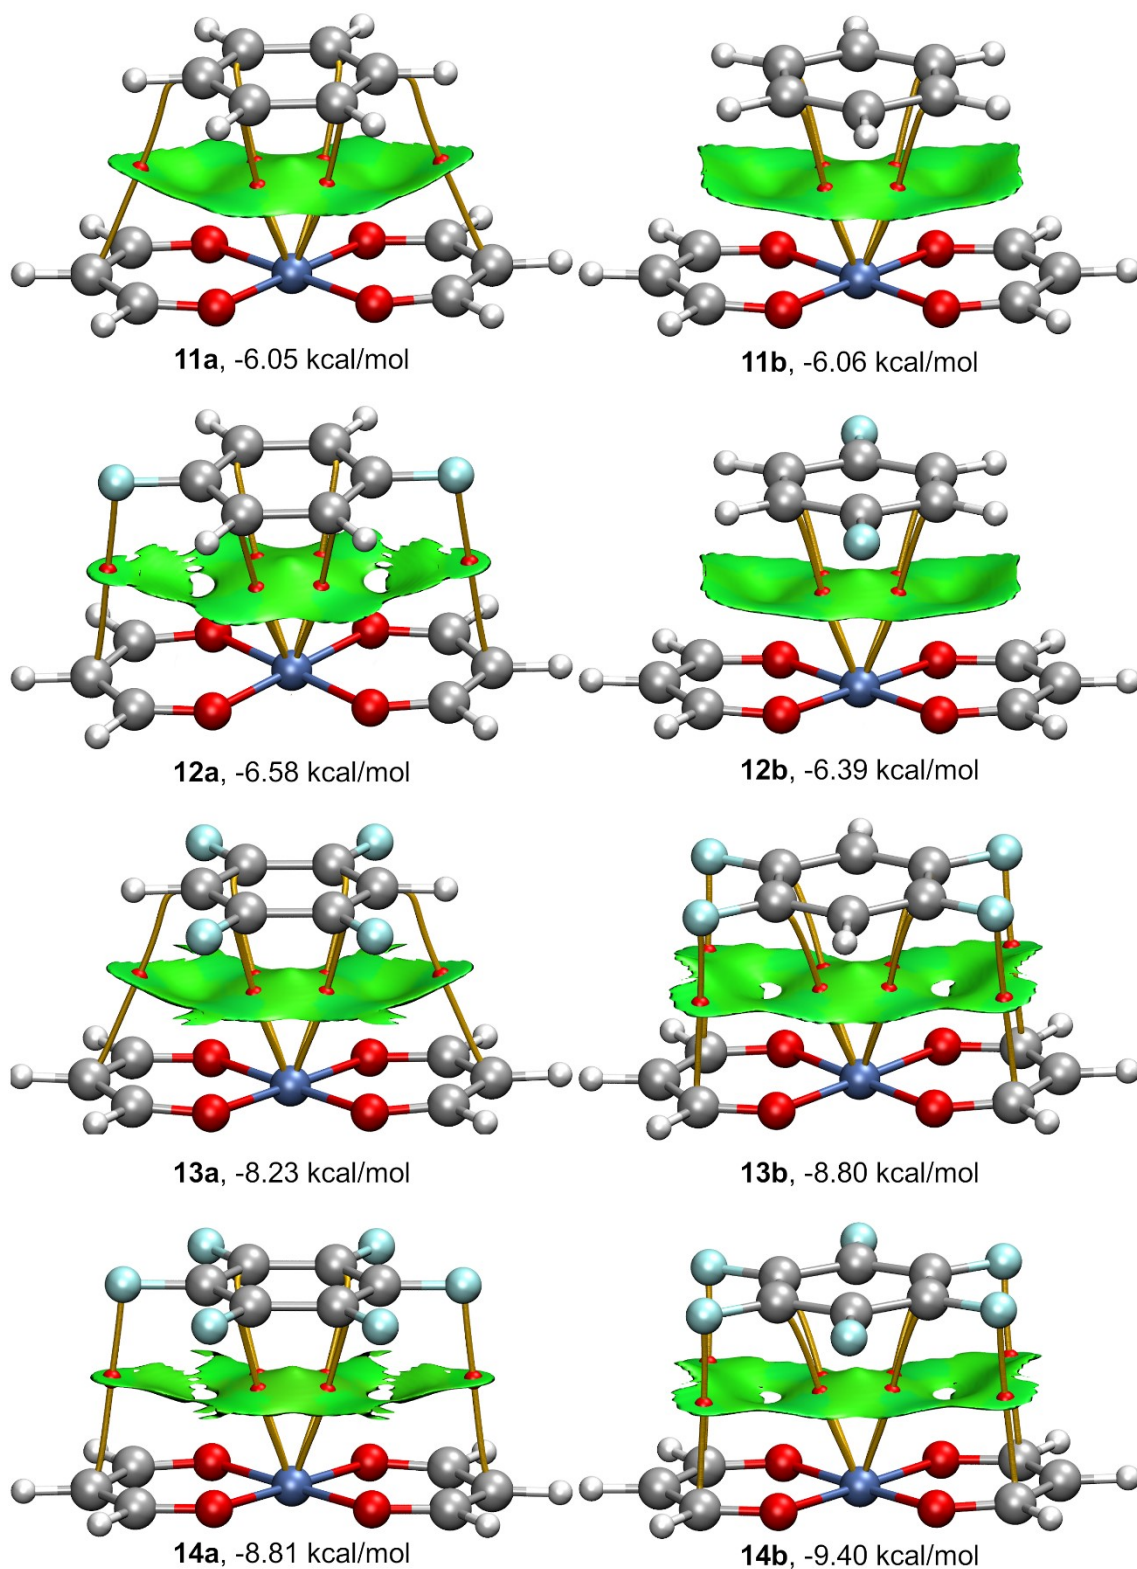

**Figure S1** QTAIM (bond CPs in red and bond paths as solid lines) and NCIplot (RDG = 0.5 a.u.  $\rho$  cut-off = 0.05 a.u., colour range  $\pm 0.035$  a.u.) for nickel complexes **11-14**.

**Figure S2 (QTAIM and NCIplot for palladium complexes 15-18)**

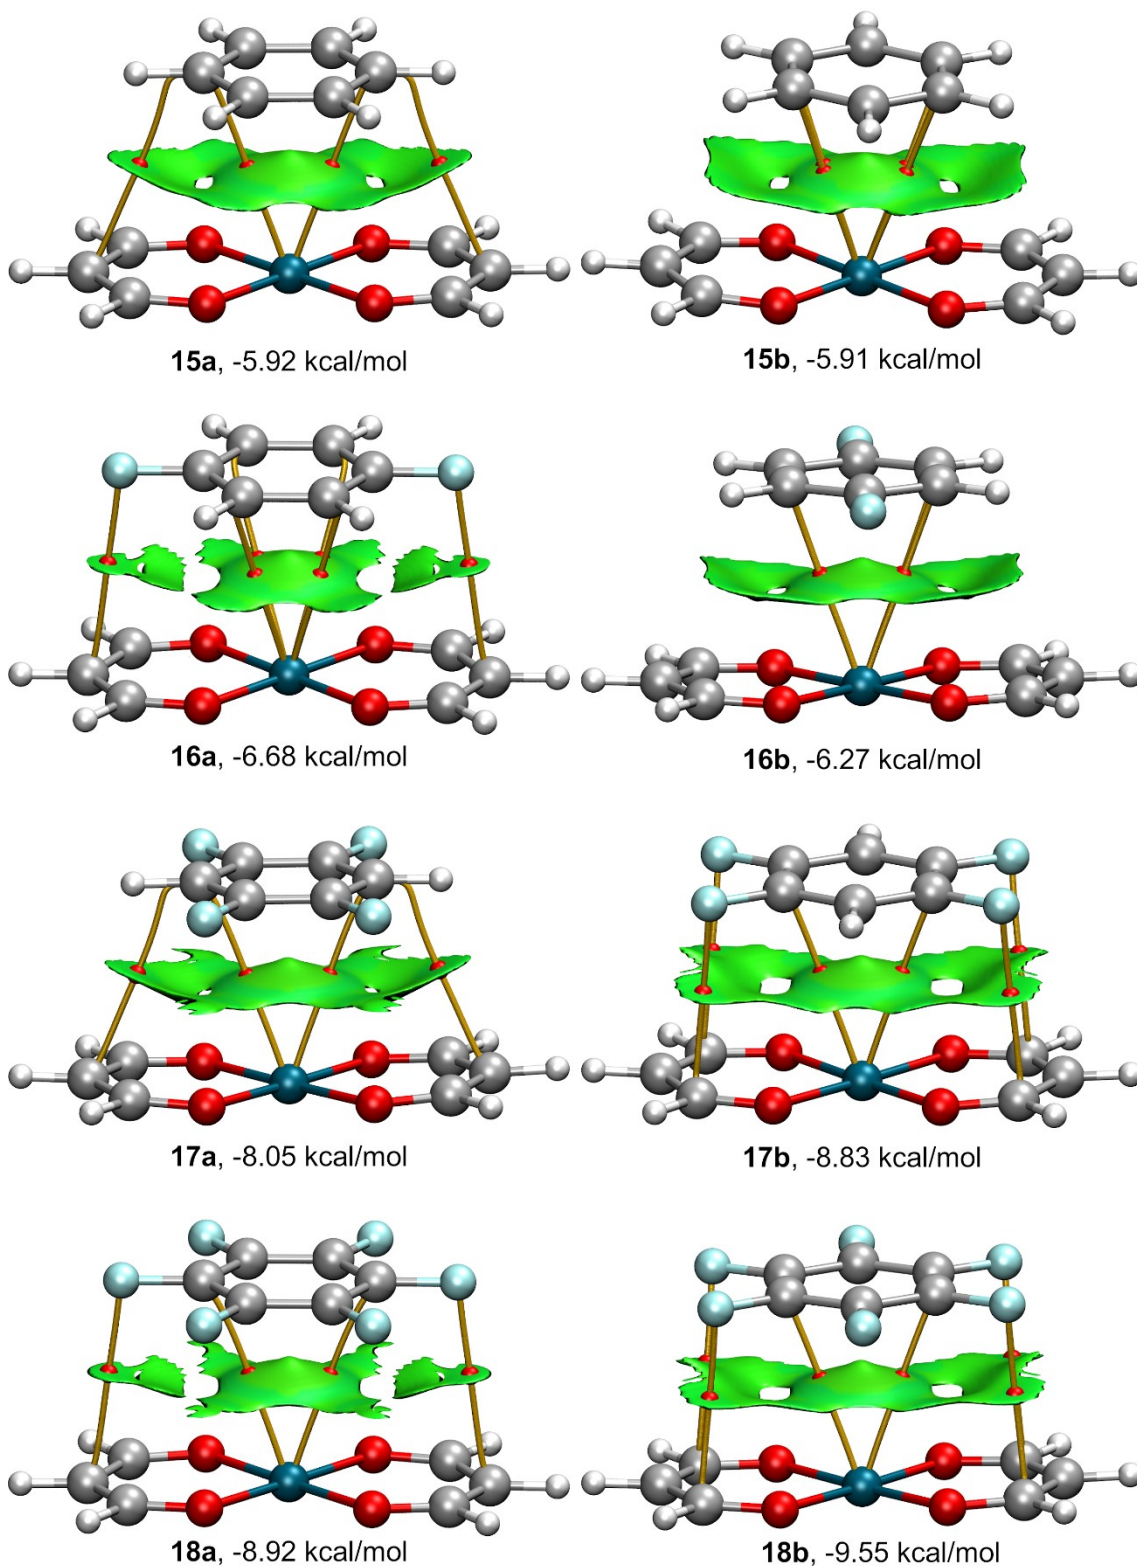

**Figure S2** QTAIM (bond CPs in red and bond paths as solid lines) and NCIplot (RDG = 0.5 a.u.  $\rho$  cut-off = 0.05 a.u., colour range  $\pm 0.035$  a.u.) for palladium complexes **15-18**.

Figure S3 (QTAIM and NCIplot for nickel complexes 23-26)

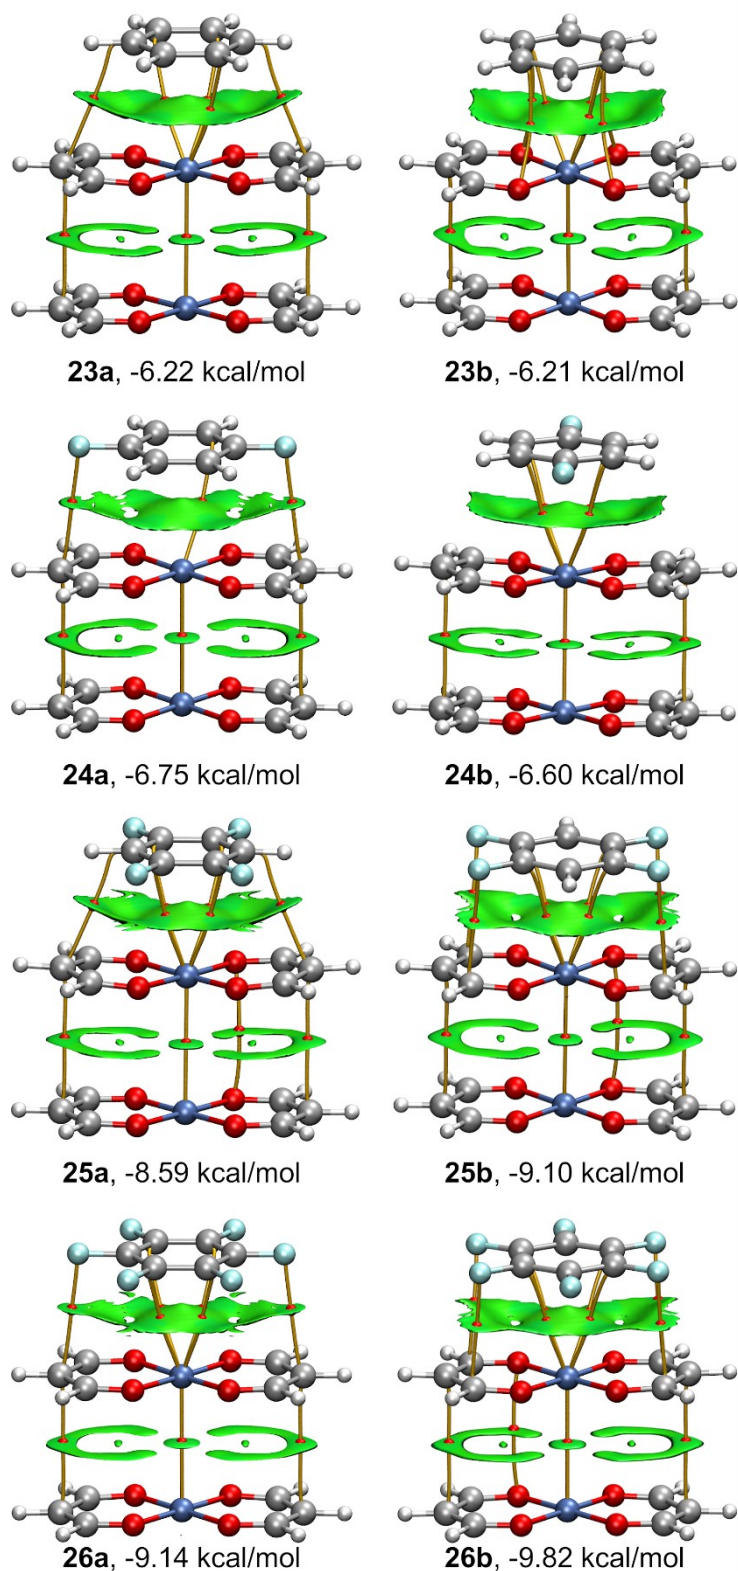

Figure S3 QTAIM (bond CPs in red and bond paths as solid lines) and NCIplot (RDG = 0.5 a.u.  $\rho$  cut-off = 0.05 a.u., colour range  $\pm 0.035$  a.u.) for nickel complexes 23-26.

Figure S4 (QTAIM and NCIplot for palladium complexes 27-30)

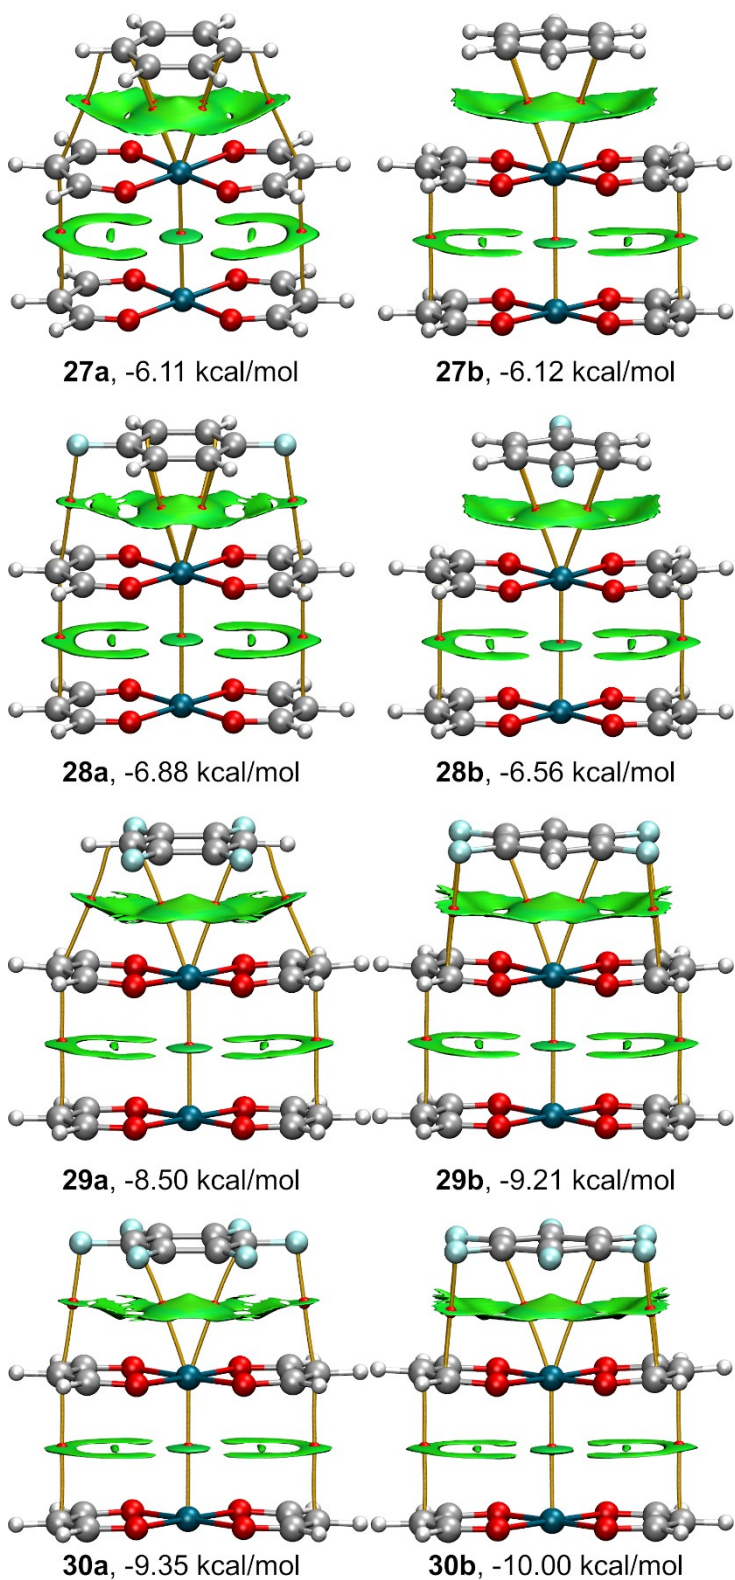

Figure S4 QTAIM (bond CPs in red and bond paths as solid lines) and NCIplot (RDG = 0.5 a.u.  $\rho$  cut-off = 0.05 a.u., colour range  $\pm 0.035$  a.u.) for palladium complexes 27-30.

Figure S5 (QTAIM and NCIplot for platinum complexes 31b-34b)

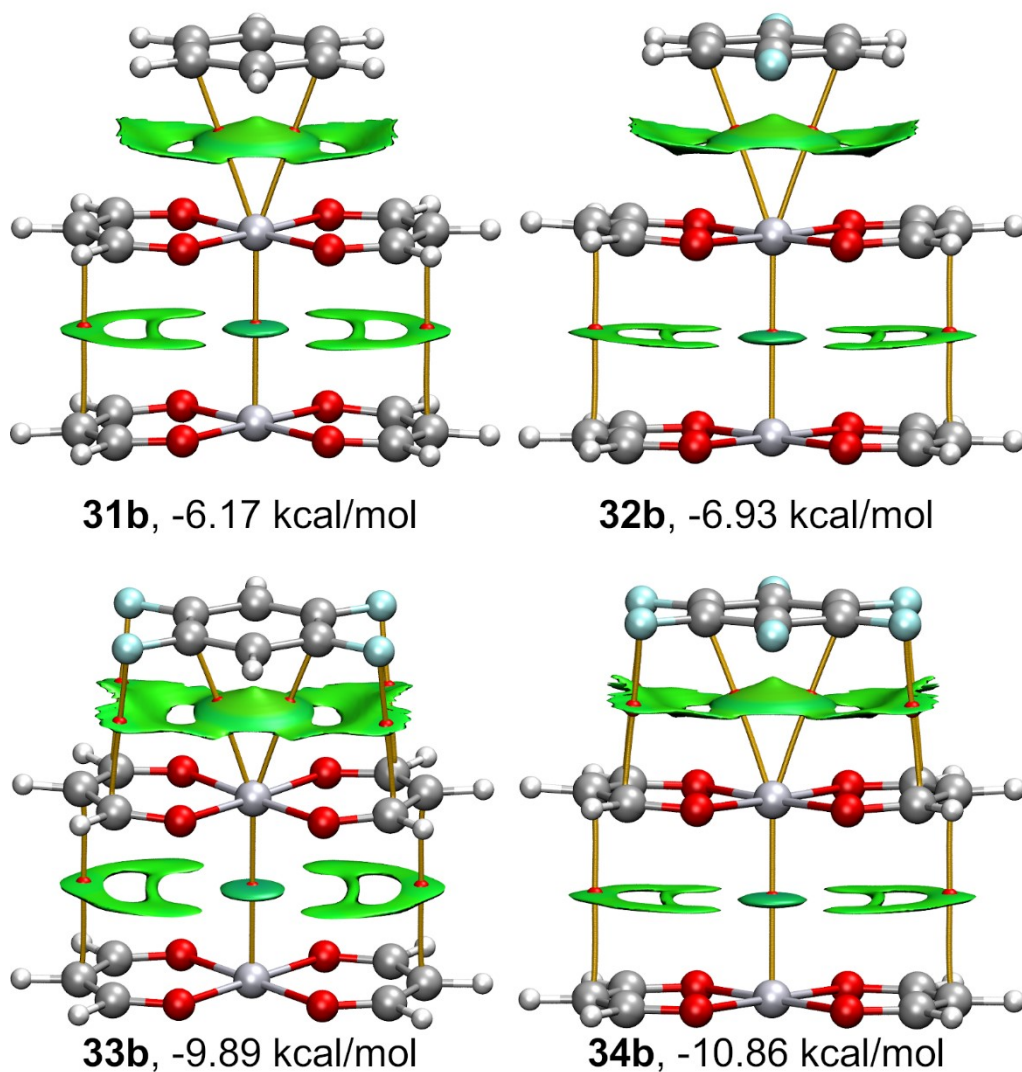

Figure S5 QTAIM (bond CPs in red and bond paths as solid lines) and NCIplot (RDG = 0.5 a.u.  $\rho$  cut-off = 0.05 a.u., colour range  $\pm 0.035$  a.u.) for platinum complexes 31b-34b.
